# Supplementary material
Source: PubMed Central journal article supplement (PMC10749988)
Supplement: NIHMS1914604-supplement-1.pdf [file NIHMS1914604-supplement-1.pdf]

American Journal of Preventive Medicine

## **Hepatitis C cascade of care in the direct-acting antivirals era: a meta-analysis**

Pilar Hernandez-Con, MD, Debbie L. Wilson PhD, Huilin Tang, MS, Ikenna Unigwe, MS, Munaza Riaz, MS, Natalie Ourhaan, PharmD, Xinyi Jiang, PhD, Hyun Jin Song, PhD, Amanda Joseph, Linda Henry, PhD, Robert Cook, MD, Dushyantha Jayaweera, MD, Haesuk Park, PhD

## **Appendix**

### **Appendix Table 1: Strategy for literature search**

---

MEDLINE

1. exp Hepatitis C/
  2. exp Hepatitis C, Chronic/
-

- 
3. exp Hepacivirus/
  4. chronic viral hepatitis.mp.
  5. ("hepatitis C" or HCV or CHC).mp.
  6. or/1-5
  7. exp Mass Screening/
  8. exp Point-of-Care Testing/
  9. (screen\* or test\*).mp.
  10. exp Hepatitis C Antibodies/
  11. Hepatitis C Antibody Positive.mp.
  12. Anti-HCV\*.mp.
  13. or/7-12
  14. exp Awareness/
  15. exp Knowledge/
  16. exp Comprehension/
  17. exp Health Knowledge, Attitudes, Practice/
  18. exp Education/
  19. (awareness or knowledge or understanding or comprehension).mp.
  20. (education or educate or teach or training or program).mp.
  21. or/14-20
  22. exp Primary Health Care/
  23. exp "Continuity of Patient Care"/
  24. exp Ambulatory Care/
  25. exp "Referral and Consultation"/
  26. exp Retention in Care/
  27. exp Counseling/
  28. exp "Treatment Adherence and Compliance"/
  29. liver disease assess\*.mp.
  30. (care\* or link\* or refer\* or retention or retain\* or counseling or adherence or adhere or compliance or comply or follow-up or engagement).mp.
  31. or/22-30
  32. exp Diagnosis/
-

- 
33. exp RNA/
  34. exp Viral Load/
  35. (diagnos\* or RNA or "viral load" or "PCR positive" or "HCV PCR" or "Nucleic Acid Testing").mp.
  36. or/32-35
  37. exp Liver Cirrhosis/
  38. (cirrhosis or fibrosis or biopsy or elastograph\* or fibroscan or Staging or FIB-4 or APRI or Genotyping).mp.
  39. or/37-38
  40. exp Antiviral Agents/
  41. ("direct acting antiviral" or DAA).mp.
  42. exp Medication Therapy Management/
  43. exp Drug Therapy/
  44. exp Therapeutics/
  45. (Therap\* or treat\* or regimen or prescription\* or uptake or initiation or intervention).mp.
  46. or/40-45
  47. exp Sustained Virologic Response/
  48. ("sustained virologic response" or SVR).mp.
  49. exp Treatment Outcome/
  50. ("treatment success" or "treatment outcome" or cure or suppression).mp.
  51. or/47-50
  52. 6 and (13 or 21 or 31 or 36 or 39 or 46 or 51)
  53. limit 52 to (human and english language and yr="2014 -Current")
- 

#### EMBASE

1. exp Hepatitis C/
  2. exp Hepatitis C, Chronic/
  3. exp hepacivirus/
  4. chronic viral hepatitis.mp.
  5. ("hepatitis C" or HCV or CHC).mp.
  6. or/1-5
  7. exp Mass Screening/
  8. exp Point-of-Care Testing/
  9. (screen\* or test\*).mp.
-

- 
10. exp Hepatitis C Antibodies/
  11. Hepatitis C Antibody Positive.mp.
  12. Anti-HCV\*.mp.
  13. or/7-12
  14. exp Awareness/
  15. exp knowledge/
  16. exy Comprehension/
  17. exp Health Knowledge, Attitudes, Practice/
  18. exp Education/
  19. (awareness or knowledge or understanding or comprehension).mp.
  20. (education or educate or teach or training or program).mp.
  21. Or/14-20
  22. Exp Primary Health Care/
  23. Exp "Continuity of Patient Care"/
  24. Exp Ambulatory Care/
  25. Exp "Referral and Consultation"/
  26. Exp Retention in Care/
  27. Exp Counseling/
  28. Exp "Treatment Adherence and Compliance"/
  29. Liver disease assess\*.mp.
  30. (care\* or link\* or refer\* or retention or retain\* or counseling or adherence or adhere or compliance or comply or follow-up or engagement).mp.
  31. Or/22-30
  32. Exp diagnosis/
  33. Exp RNA
  34. Exp Viral Load/
  35. (diagnos\* or RNA or "viral load" or PCR positive" or "Nucleic Acid Testing").mp.
  36. Or/32-35
  37. Exp Liver Cirrhosis/
  38. (cirrhosis or fibrosis or biopsy or elastography\* or fibroscan or Staging or FIB-4 or APRI or Genotyping).mp.
  39. Or/37-38
-

- 
40. Exp Antiviral Agents/
  41. (direct acting antiviral” or DAA).mp.
  42. Exp Medication Therapy Management/
  43. Exp Drug Therapy/
  44. Exp Therapeutics/
  45. (Therap\* or treat\* or regimen or prescription\* or uptake or initiation or intervention).mp.
  46. Or/40-45
  47. Exp Sustained Virologic Resposne/
  48. (“sustained virologic response” or SVR).mp.
  49. Exp Treatment Outcome/
  50. (“treatment success” or “treatment outcome” or cure or suppression).mp.
  51. Or/47-50
  52. 6 and (13 or 21 or 31 or 36 or 39 or 46 or 51)
  53. Limit 52 to (human and English language and yr=“2014 -Current”)
- 

Cochrane library

1. MeSH descriptor: [Hepatitis C] explode all trees
  2. MeSH descriptor: [Hepatitis C, Chronic] explode all trees
  3. MeSH descriptor: [Hepacivirus] explode all trees
  4. (chronic viral hepatitis):ti,ab,tw
  5. (“hepatitis C” or HCV or CHC):ti,ab,tw
  6. #1 or #2 or #3 or #4 or #5
  7. MeSH descriptor: [Mass Screening] explode all trees
  8. MeSH descriptor: [Point-of-Care Testing] explode all trees
  9. (screen\* or test\*):ti,ab,tw
  10. MeSH descriptor: [Hepatitis C Antibodies] explaode all trees
  11. (Hepatitis C Antibody Positive):ti,ab,tx
  12. (Anti-HCV\*):ti,ab,tw
  13. #7 or #8 or #9 or #10 or #11 or #12
  14. MeSH descriptor: [Awareness] explode all trees
  15. MeSH descriptor: [Knowledge] explode all trees
  16. MeSH descriptor: [Comprehension] explode all trees
-

- 
17. MeSH descriptor: [Health Knowledge, Attitudes, Practice] explode all trees
  18. MeSH descriptor: [Education] explode all trees
  19. (awareness or knowledge or understanding or comprehension):ti,ab,tw
  20. (education or educate or teach or training or program):iw,ab,tw
  21. #14 or #15 or #16 or #17 or #18 or #19 or #20
  22. MeSH descriptor: [Primary Health Care] explode all trees
  23. MeSH descriptor: [Continuity of Patient Care] explode all trees
  24. MeSH descriptor: [Ambulatory Care] explode all trees
  25. MeSH descriptor: [Referral and Consultation] explode all trees
  26. MeSH descriptor: [Retention in Care] explode all trees
  27. MeSH descriptor: [Counseling] explode all trees
  28. MeSH descriptor: [ Treatment Adherence and Compliance] explode all trees
  29. (liver disease assess\*):ti,ab,tw
  30. (care\* or link\* or refer\* or retention or retain\* or counseling or adhere\* or adhere or compliance or comply or follow-up or engagement):ti,ab,tw
  31. #22 or #23 or #24 or #25 or #26 or #27 or #28 or #29 or #30
  32. MeSH descriptor: [Diagnosis] explode all trees
  33. MeSH descriptor: [RNA] explode all trees
  34. MeSH descriptor: [Viral Load] explode all trees
  35. (diagnosis\* or RNA or “viral load” or “PCR positive” or “HCV PCR” or “Nucleic Acid Testing”):ti,ab,tw
  36. #32 or #33 or #34 or #35
  37. MeSH descriptor: [Liver Cirrhosis] explode all trees
  38. (cirrhosis or fibrosis or biopsy or elastography\* or fibroscan or Staging or FIB-4 or APRI or Genotyping):ti,ab,tw
  39. #37 or #38
  40. MeSH descriptor: [Antiviral Agents] explode all trees
  41. (“direct acting antiviral” or DAA): ti,ab,tw
  42. MeSH descriptor: [Medication Therapy management] explode all trees
  43. MeSH descriptor: [Drug Therapy] explode all trees
  44. MeSH descriptor: [Therapeutics] explode all trees
  45. (Therap\* or treat\* or regimen or prescription\* or uptake or initiation or intervention):ti,ab,tw
  46. #40 or #41 or #42 or #43 or #44 or #45
-

- 
47. MeSH descriptor: [Sustained Virologic Response] explode all trees
  48. ("sustained virologic response" or SVR):ti,ab,tw
  49. MeSH descriptor: [Treatment Outcome] explode all trees
  50. ("treatment success" or "treatment outcome" or cure or suppression):ti,ab,tw
  51. #47 or #48 or #49 or #50
  52. #6 and (#13 or #21 or #31 or #36 or #39 or #46 or #51)
  53. 52 with Publication year from 2014 to 2021, in Trials
- 

#### CINAHL

1. MH Hepatitis C OR MH Hepatitis C, Chronic OR MH Hepacivirus
  2. TI chronic viral hepatitis OR AB chronic viral hepatitis OR TI hepatitis c OR AB hepatitis c OR TI HCV OR AB HCV OR TI CHC OR AB CHC
  3. S1 OR S2
  4. MH Mass Screening OR MH Point-of-Care Testing
  5. TI screen\* OR AB screen\* OR TI test\* OR AB test\*
  6. MH Hepatitis C Antibodies OR TI Hepatitis C Antibody Positive OR AB Hepatitis C Antibody Positive OR TI Anti-HCV\* OR AB Anti-HCV
  7. S4 OR S5 OR S6
  8. MH Awareness OR MH Knowledge OR MH Comprehension OR MH Health Knowledge, Attitudes, Practice OR MH Education
  9. TI (awareness or knowledge or understanding or comprehension) OR AB (awareness or knowledge or understanding or comprehension)
  10. TI (education or educate or teach or training or program) OR AB (education or teach or training or progra
  11. S8 OR S9 OR S10
  12. MH Primary Health Care OR MH Continuity of Patient Care OR MH Ambulatory Care OR MH (Referral and consultation) OR MH Retention in Care OR MH Counseling AND MH (Treatment Adherence and Compliance)
  13. TI liver disease assess\* OR AB liver disease assess\*
  14. TI (care\* or link\* or refer\* or retention or retain\* or counseling or adherence or adhere or compliance or comply or follow-up engagement) OR AB (care\* or link\* or refer\* or retention or retain\* or counseling or adherence or adhere or compliance or comply or follow-up or engagement)
  15. S12 OR S13 OR S14
-

- 
16. MH Diagnosis OR MH RNA OR Viral Load
  17. TI (diagnos\* or RNA or “viral load” or “PCR positive” or “HCV PCR” or “Nucleic Acid Testing”) OR AB (diagnos\* or RNA or “viral load” or “PCR positive” or “HCV PCR” or “Nucleic Acid Testing)
  18. S16 OR S17
  19. MG Liver Cirrhosis
  20. TI (cirrhosis or fibrosis or biopsy or elastography\* or fibroscan or Staging or FIB-4 or APRI or Genotyping) OR AB (cirrhosis or fibrosis or biopsy or elastography\* or fibroscan or Staging or FIB-4 or APRI or Genotyping)
  21. S19 OR S20
  22. MH Antiviral Agents
  23. TI (“direct acting antiviral” or DAA) OR AB (“direct acting antiviral” or DAA)
  24. MH Medication Therapy management OR MH Drug Therapy OR MH Therapeutics
  25. TI (Therap\* or treat\* or regimen or prescription\* or uptake or initiation or intervention) OR AB (Therap\* or treat\* or regimen or prescription\* or uptake or initiation or intervention)
  26. S22 OR S23 OR S24 OR S25
  27. TI (“sustained virologic response” OR SVR (“sustained virologic response” or SVR)
  28. TI (“treatment success” or “treatment outcome” or cure or suppression) OR AB (“treatment success” or “treatment outcome” or cure suppression)
  29. S27 OR S28
  30. S7 OR S11 OR S15 OR S18 OR S21 OR S26 OR S29
  31. S3 AND S30
  32. S3 AND S30 Limiters- Published Date: 20140101-20210331; English Language; Human

---

#### PsyclINFO

1. Hepatitis C.mp.
  2. Chronic viral hepatitis.mp.
  3. (hepacivirus HCV or CHC).mp.
  4. Or/1-3
  5. Exp Screening/
  6. Exp Testing/
  7. (screen\* or test\*).mp.
  8. Hepatitis C Antibodies.mp.
-



- 
9. Anti-HCV\*.mp.
  10. Or/5-9
  11. Exp Awareness/
  12. Exp Comprehension/
  13. Exp Education/
  14. (awareness or knowledge or understanding or comprehension).mp.
  15. (education or educate or teach or training or program).mp.
  16. Or/11-15
  17. Exp Primary Health Care/
  18. Exp Outpatient Treatment/
  19. Exp Retention/
  20. Exp Counseling/
  21. Exp Treatment Compliance/
  22. (care\* or link\* or reger\* or retention or retain\* or counseling or adherence or adhere or compliance or comply or follow-up or engagement).mp.
  23. Liver disease assess\*.mp.
  24. Or/17-23
  25. Exp Diagnosis/
  26. (diagnos\* or RNA or "viral load" or "PCR positive" or "HCV PCR" or "Nucleic Acid Testing").mp.
  27. Or/25-26
  28. Exp "Cirrhosis (Liver)"/
  29. Exp Liver Disorders/
  30. (cirrhosis or fibrosis or biopsy or elastography\* or fibroscan or Staging or FIB-4 or APRI or Genotyping).mp.
  31. Or/28-30
  32. Exp Antiviral Drugs/
  33. ("direct acting antiviral" or DAA).mp.
  34. Exp Drug Therapy/
  35. Exp Drug Treatment/
  36. (Therap\* or treat\* or regimen or prescription\* or uptake or initiation or intervention).mp.
  37. Or/32-36
  38. ("sustained virologic response" or SVR).mp.
-

- 
39. Exp Treatment Outcomes/
  40. ("treatment success" or "treatment outcome" or cure or suppression).mp.
  41. Or/38-40
  42. 4 and (10 or 16 or 24 or 27 or 31 or 37 or 41)
  43. Limit 42 to (human and English language and yr="2014 -Current")
-

**Appendix Table 2: Characteristics and results of included studies**

| <b>Author, year</b>                     | <b>Location</b>              | <b>Study design</b>           | <b>Setting; population</b>                                                                                                          | <b>Eligible population</b> | <b>Intervention for screening</b>                                                                   | <b>Intervention for linkage to care</b> | <b>Outcomes</b>                                                                                                                                                                 |
|-----------------------------------------|------------------------------|-------------------------------|-------------------------------------------------------------------------------------------------------------------------------------|----------------------------|-----------------------------------------------------------------------------------------------------|-----------------------------------------|---------------------------------------------------------------------------------------------------------------------------------------------------------------------------------|
| <b>Abe et al., 2019<sup>1</sup></b>     | Dallas, Texas, U.S.          | Interventional                | County Jail; Incarcerated individuals                                                                                               | 4,089                      | Routine opt-out HCV screening and confirmatory HCV RNA testing with assistance of a nurse navigator | N/A                                     | <ul style="list-style-type: none"> <li>• Proportion of individuals with positive HCV antibody tests</li> <li>• Proportion of individuals with positive HCV RNA tests</li> </ul> |
| <b>Adamson et al., 2020<sup>2</sup></b> | New Haven, Connecticut, U.S. | Observational (retrospective) | 1 integrated clinic (HCV clinic) and 1 nonintegrated clinic; Adults (age not specified) visiting a primary care practice within one | 8,405                      | N/A                                                                                                 | N/A                                     | <ul style="list-style-type: none"> <li>• Proportion of individuals linked to first appointment</li> <li>• Proportion of individuals with</li> </ul>                             |

|                                          |                        |                               |                                                                 |     |     |     |                                                                                                                                                                                                                                      |
|------------------------------------------|------------------------|-------------------------------|-----------------------------------------------------------------|-----|-----|-----|--------------------------------------------------------------------------------------------------------------------------------------------------------------------------------------------------------------------------------------|
|                                          |                        |                               | year from study initiation                                      |     |     |     | <p>treatment initiation</p> <ul style="list-style-type: none"> <li>• Proportion of individuals with treatment completion</li> <li>• Proportion of individuals achieving SVR</li> </ul>                                               |
| <b>Adekunle et al., 2020<sup>3</sup></b> | Atlanta, Georgia, U.S. | Observational (retrospective) | VAHCS; Veterans ( $\geq$ 18 years old) with HIV/HCV coinfection | 250 | N/A | N/A | <ul style="list-style-type: none"> <li>• Proportion of individuals successfully contacted</li> <li>• Proportion of individuals linked to first appointment</li> <li>• Proportion of individuals with treatment completion</li> </ul> |

|                                        |              |                               |                                                                                       |        |     |     |                                                                                                                                                                                                                                                                                                                 |
|----------------------------------------|--------------|-------------------------------|---------------------------------------------------------------------------------------|--------|-----|-----|-----------------------------------------------------------------------------------------------------------------------------------------------------------------------------------------------------------------------------------------------------------------------------------------------------------------|
|                                        |              |                               |                                                                                       |        |     |     | <ul style="list-style-type: none"> <li>• Proportion of individuals achieving SVR</li> </ul>                                                                                                                                                                                                                     |
| <b>Adland et al., 2018<sup>4</sup></b> | Southeast UK | Observational (retrospective) | Large tertiary referral teaching hospital; All individuals screened for HCV infection | 19,283 | N/A | N/A | <ul style="list-style-type: none"> <li>• Proportion of individuals with positive HCV antibody tests</li> <li>• Proportion of individuals with positive HCV RNA tests</li> <li>• Proportion of individuals linked to first appointment</li> <li>• Proportion of individuals with treatment initiation</li> </ul> |

|                                       |                  |                |                                                                                       |     |     |                                                                                                                                                               |                                                                                                                                                                                                                                                                                            |
|---------------------------------------|------------------|----------------|---------------------------------------------------------------------------------------|-----|-----|---------------------------------------------------------------------------------------------------------------------------------------------------------------|--------------------------------------------------------------------------------------------------------------------------------------------------------------------------------------------------------------------------------------------------------------------------------------------|
|                                       |                  |                |                                                                                       |     |     |                                                                                                                                                               | <ul style="list-style-type: none"> <li>• Proportion of individuals achieving SVR</li> </ul>                                                                                                                                                                                                |
| <b>Akyar et al., 2016<sup>5</sup></b> | New Jersey, U.S. | Interventional | Psychiatric facility with opioid detoxification program; Young PWID (17-35 years old) | 861 | N/A | Follow-up visits before discharge to counsel individuals about HCV disease and link them to care. Appointments to HCV care were coordinated before discharge. | <ul style="list-style-type: none"> <li>• Proportion of individuals with positive HCV antibody tests</li> <li>• Proportion of individuals with positive HCV RNA tests</li> <li>• Proportion of individuals linked to first appointment</li> <li>• Proportion of individuals with</li> </ul> |

|                                                 |                                                                |                       |                                                                                                                 |               |                                                                                  |                                                                                                                                                                                                                                                          |                                                                                                                                                                                                                                                                            |
|-------------------------------------------------|----------------------------------------------------------------|-----------------------|-----------------------------------------------------------------------------------------------------------------|---------------|----------------------------------------------------------------------------------|----------------------------------------------------------------------------------------------------------------------------------------------------------------------------------------------------------------------------------------------------------|----------------------------------------------------------------------------------------------------------------------------------------------------------------------------------------------------------------------------------------------------------------------------|
|                                                 |                                                                |                       |                                                                                                                 |               |                                                                                  |                                                                                                                                                                                                                                                          | <p>treatment initiation</p> <ul style="list-style-type: none"> <li>• Proportion of individuals achieving SVR</li> </ul>                                                                                                                                                    |
| <p><b>Anderson et al., 2017<sup>6</sup></b></p> | <p>Oakland, California, U.S. and Birmingham, Alabama, U.S.</p> | <p>Interventional</p> | <p>2 urban EDs: Highland Hospital (HH) and University of Alabama at Birmingham (UAB); Baby Boomers and PWID</p> | <p>55,335</p> | <p>Triage-based opt-out HCV screening in target populations by triage nurses</p> | <p>Follow-up with HCV treatment provider arranged by EP for individuals with positive HCV antibody tests, otherwise by LTCC if chronically infected (HH). Follow-up with HCV treatment provider arranged by LTCC only if chronically infected (UAB).</p> | <ul style="list-style-type: none"> <li>• Proportion of individuals screened for HCV</li> <li>• Proportion of individuals with positive HCV antibody tests</li> <li>• Proportion of individuals with positive HCV RNA tests</li> <li>• Proportion of individuals</li> </ul> |

|                                        |                |                |                                                                                                |     |                                                                                                                                                                                                             |                                                               |                                                                                                                                                                                                                      |
|----------------------------------------|----------------|----------------|------------------------------------------------------------------------------------------------|-----|-------------------------------------------------------------------------------------------------------------------------------------------------------------------------------------------------------------|---------------------------------------------------------------|----------------------------------------------------------------------------------------------------------------------------------------------------------------------------------------------------------------------|
|                                        |                |                |                                                                                                |     |                                                                                                                                                                                                             |                                                               | linked to a first appointment <ul style="list-style-type: none"> <li>• Proportion of individuals with treatment initiation</li> <li>• Proportion of individuals achieving SVR</li> </ul>                             |
| <b>Arnold et al., 2018<sup>7</sup></b> | Maryland, U.S. | Interventional | Outpatient urban behavioral health clinic; African American adults with serious mental illness | 170 | Opt-in HCV screening facilitated by a registered nurse and delivered within the mental health system (intervention known as STIRR-IT: Screening, Testing, Risk-Reduction, Integrated treatment, collocating | Referral to an ID clinic by an experienced nurse practitioner | <ul style="list-style-type: none"> <li>• Proportion of individuals with positive HCV antibody tests</li> <li>• Proportion of individuals successfully contacted</li> <li>• Proportion of individuals with</li> </ul> |



|                                       |                   |                |                                                                                |     |                                                                                                                 |                                                                                                                                                                   |                                                                                                                                                                                                                                                                                                |
|---------------------------------------|-------------------|----------------|--------------------------------------------------------------------------------|-----|-----------------------------------------------------------------------------------------------------------------|-------------------------------------------------------------------------------------------------------------------------------------------------------------------|------------------------------------------------------------------------------------------------------------------------------------------------------------------------------------------------------------------------------------------------------------------------------------------------|
|                                       |                   |                |                                                                                |     | HCV screening with mental health services)                                                                      |                                                                                                                                                                   | treatment initiation <ul style="list-style-type: none"> <li>• Proportion of individuals achieving SVR</li> </ul>                                                                                                                                                                               |
| <b>Bajis et al., 2019<sup>8</sup></b> | Sydney, Australia | Interventional | Homelessness service center in an inner-city; People experiencing homelessness | 202 | Opt-in HCV screening with fingerstick capillary whole blood-sample collection for point of care HCV RNA testing | Schedule of follow-up appointments for individuals with positive HCV RNA tests by general practitioner or nurse. Remuneration with AUS \$20 voucher at follow-up. | <ul style="list-style-type: none"> <li>• Proportion of individuals with positive HCV RNA tests</li> <li>• Proportion of individuals linked to a first appointment</li> <li>• Proportion of individuals with treatment initiation</li> <li>• Proportion of individuals achieving SVR</li> </ul> |

|                                        |                |                |                                                   |       |                                                                                                                                                                                                                                                                                                                                                                                              |                                                                                                                                           |                                                                                                                                                                                                                                                                                                              |
|----------------------------------------|----------------|----------------|---------------------------------------------------|-------|----------------------------------------------------------------------------------------------------------------------------------------------------------------------------------------------------------------------------------------------------------------------------------------------------------------------------------------------------------------------------------------------|-------------------------------------------------------------------------------------------------------------------------------------------|--------------------------------------------------------------------------------------------------------------------------------------------------------------------------------------------------------------------------------------------------------------------------------------------------------------|
| <b>Bakhai et al., 2019<sup>9</sup></b> | New York, U.S. | Interventional | Safety-net internal medicine clinic; Baby boomers | 1,291 | Integration of an HCV screening tool in the EHR. Opt-in HCV screening (then switched to opt-out) screening by the nursing staff to target population (offering was fully integrated in the nurse workflow prior to physician evaluation). Physician, nursing and affected individuals' education about HCV screening. Physician reminders with HCV screening posters. Refresher training and | Individuals with confirmed HCV infection were referred to a hepatology clinic. Reschedule of appointment if first appointment was missed. | <ul style="list-style-type: none"> <li>• Proportion of individuals with positive HCV antibody tests</li> <li>• Proportion of individuals with positive HCV RNA tests</li> <li>• Proportion of individuals successfully contacted</li> <li>• Proportion of individuals linked to first appointment</li> </ul> |
|----------------------------------------|----------------|----------------|---------------------------------------------------|-------|----------------------------------------------------------------------------------------------------------------------------------------------------------------------------------------------------------------------------------------------------------------------------------------------------------------------------------------------------------------------------------------------|-------------------------------------------------------------------------------------------------------------------------------------------|--------------------------------------------------------------------------------------------------------------------------------------------------------------------------------------------------------------------------------------------------------------------------------------------------------------|

|                                              |                               |                |                                                                                                                   |       |                                                                                                     |                                                                                                                                                                                                                                                    |                                                                                                                                                                                               |
|----------------------------------------------|-------------------------------|----------------|-------------------------------------------------------------------------------------------------------------------|-------|-----------------------------------------------------------------------------------------------------|----------------------------------------------------------------------------------------------------------------------------------------------------------------------------------------------------------------------------------------------------|-----------------------------------------------------------------------------------------------------------------------------------------------------------------------------------------------|
|                                              |                               |                |                                                                                                                   |       | education to new interns about EHR record workflow for HCV screening.                               |                                                                                                                                                                                                                                                    |                                                                                                                                                                                               |
| <b>Bartholomew et al., 2020<sup>10</sup></b> | Miami, Florida, U.S.          | Interventional | Syringe Service Programs; PWID                                                                                    | 1,059 | Opt-out /HCV screening at enrollment and bundled HIV/HCV antibody fingerstick point-of-care testing | N/A                                                                                                                                                                                                                                                | <ul style="list-style-type: none"> <li>• Proportion of individuals screened for HCV</li> </ul>                                                                                                |
| <b>Benitez et al., 2020<sup>11</sup></b>     | Los Angeles, California, U.S. | Interventional | Local network of health centers; People experiencing homelessness who were baby boomers and with HCV risk factors | 6,767 | Opt-in HCV screening with reflex HCV RNA testing                                                    | All individuals who tested positive for HCV were contacted via phone by a care coordinator within 72 h to return for a follow-up medical. Two letters were sent to individuals who were not reachable via phone. Visits to nearby shelters by care | <ul style="list-style-type: none"> <li>• Proportion of individuals screened for HCV</li> <li>• Proportion of individuals with positive HCV antibody tests</li> <li>• Proportion of</li> </ul> |

|                                                   |                                  |                       |                                                   |               |                                                  |                                                                     |                                                                                                                                                                                                                                                                                                                                          |
|---------------------------------------------------|----------------------------------|-----------------------|---------------------------------------------------|---------------|--------------------------------------------------|---------------------------------------------------------------------|------------------------------------------------------------------------------------------------------------------------------------------------------------------------------------------------------------------------------------------------------------------------------------------------------------------------------------------|
|                                                   |                                  |                       |                                                   |               |                                                  | <p>coordinator for individuals unreachable by phone or letters.</p> | <p>individuals with positive HCV RNA tests</p> <ul style="list-style-type: none"> <li>• Proportion of individuals linked to first appointment</li> <li>• Proportion of individuals with treatment initiation</li> <li>• Proportion of individuals with treatment completion</li> <li>• Proportion of individuals reaching SVR</li> </ul> |
| <p><b>Blackwell et al., 2020<sup>12</sup></b></p> | <p>Birmingham, Alabama, U.S.</p> | <p>Interventional</p> | <p>ED, academic tertiary care medical center;</p> | <p>53,297</p> | <p>Opt-out HCV screening by a nursing staff.</p> | <p>LTCC contacted individuals with confirmed HCV</p>                | <ul style="list-style-type: none"> <li>• Proportion of individuals</li> </ul>                                                                                                                                                                                                                                                            |

|                                          |                         |                |                                                                                                       |     |                                                                         |                                                                                                                                                                                                                                    |                                                                                                                                                                                                                    |
|------------------------------------------|-------------------------|----------------|-------------------------------------------------------------------------------------------------------|-----|-------------------------------------------------------------------------|------------------------------------------------------------------------------------------------------------------------------------------------------------------------------------------------------------------------------------|--------------------------------------------------------------------------------------------------------------------------------------------------------------------------------------------------------------------|
|                                          |                         |                | All individuals > 17 years old                                                                        |     | Reflex HCV viral load for individuals with positive HCV antibody tests. | infection, via telephone. LTCC coordinated follow-up with HCV specialty clinics or PCP. LTCC followed individuals for a six-month period after HCV diagnosis to assess for linkage to care.                                        | <p>with positive HCV antibody tests</p> <ul style="list-style-type: none"> <li>• Proportion of individuals with positive HCV RNA tests</li> <li>• Proportion of individuals linked to first appointment</li> </ul> |
| <b>Boodram et al., 2020<sup>13</sup></b> | Chicago, Illinois, U.S. | Interventional | Community health centers; Vulnerable populations with HCV infection, including baby boomers and PWID. | 181 | N/A                                                                     | Development of individualized strategies for building organizational infrastructure to provide health care or support services. Case management services that provided intensive follow-up to address barriers to linkage to care. | <ul style="list-style-type: none"> <li>• Proportion of individuals linked to first appointment</li> <li>• Proportion of individuals with treatment initiation</li> </ul>                                           |

|                                         |                         |                               |                                        |        |     |                                                                                                                                                                                                 |                                                                                                                                                                                                      |
|-----------------------------------------|-------------------------|-------------------------------|----------------------------------------|--------|-----|-------------------------------------------------------------------------------------------------------------------------------------------------------------------------------------------------|------------------------------------------------------------------------------------------------------------------------------------------------------------------------------------------------------|
|                                         |                         |                               |                                        |        |     | <p>Follow-up conducted through phone calls and in-person visits depending on each individual's barriers. Case managers accompanied individuals with HCV infection to provider appointments.</p> | <ul style="list-style-type: none"> <li>• Proportion of individuals with treatment completion</li> <li>• Proportion of individuals achieving SVR</li> </ul>                                           |
| <b>Bourgi et al., 2016<sup>14</sup></b> | Detroit, Michigan, U.S. | Observational (retrospective) | Internal medicine clinic; Baby boomers | 40,561 | N/A | N/A                                                                                                                                                                                             | <ul style="list-style-type: none"> <li>• Proportion of individuals screened for HCV</li> <li>• Proportion of individuals positive HCV antibody tests</li> <li>• Proportion of individuals</li> </ul> |

|                                        |                          |     |                                                     |     |                                                                                  |     |                                                                                                                                                                                                                                                                            |
|----------------------------------------|--------------------------|-----|-----------------------------------------------------|-----|----------------------------------------------------------------------------------|-----|----------------------------------------------------------------------------------------------------------------------------------------------------------------------------------------------------------------------------------------------------------------------------|
|                                        |                          |     |                                                     |     |                                                                                  |     | <p>with positive HCV RNA tests</p> <ul style="list-style-type: none"> <li>• Proportion of individuals linked to first appointment</li> <li>• Proportion of individuals with treatment initiation</li> <li>• Proportion of individuals with treatment completion</li> </ul> |
| <b>Broad et al., 2020<sup>15</sup></b> | Toronto, Ontario, Canada | RCT | 3 HCV Program sites; Adults ≥ 18 years old and PWID | 380 | Point-of-care HCV antibody testing using peer outreach workers. \$20 honorarium. | N/A | <ul style="list-style-type: none"> <li>• Proportion of individuals screened for HCV</li> <li>• Proportion of</li> </ul>                                                                                                                                                    |

|                                          |                                  |                |                                                                                                      |       |                                                                                                                                                            |                                                                                                                                                                                         |                                                                                                                                                                                                                                  |
|------------------------------------------|----------------------------------|----------------|------------------------------------------------------------------------------------------------------|-------|------------------------------------------------------------------------------------------------------------------------------------------------------------|-----------------------------------------------------------------------------------------------------------------------------------------------------------------------------------------|----------------------------------------------------------------------------------------------------------------------------------------------------------------------------------------------------------------------------------|
|                                          |                                  |                |                                                                                                      |       |                                                                                                                                                            |                                                                                                                                                                                         | <p>individuals with positive HCV antibody tests</p> <ul style="list-style-type: none"> <li>• Proportion of individuals with positive HCV RNA tests</li> <li>• Proportion of individuals linked to a first appointment</li> </ul> |
| <b>Burrell et al., 2018<sup>16</sup></b> | Central Appalachian region, U.S. | Interventional | 3 local urgent care clinics; Individuals with risk factors for HCV infection based on CDC guidelines | 6,509 | Incorporation of a BPA in the EHR identifying eligible individuals. Opt-out HCV screening. Reflex quantitative HCV RNA tests for individuals with positive | Patient navigators (PN) contacted individuals via phone. PN linked individuals to their appropriate care needs. Transport assistance and coordination with follow-up clinic schedulers. | <ul style="list-style-type: none"> <li>• Proportion of individuals screened for HCV</li> <li>• Proportion of individuals with positive HCV antibody tests</li> </ul>                                                             |



|                                         |                   |                |                                                                  |     |                                                                                           |                                                                              |                                                                                                                                                                                                                                           |
|-----------------------------------------|-------------------|----------------|------------------------------------------------------------------|-----|-------------------------------------------------------------------------------------------|------------------------------------------------------------------------------|-------------------------------------------------------------------------------------------------------------------------------------------------------------------------------------------------------------------------------------------|
|                                         |                   |                |                                                                  |     | HCV antibody tests.                                                                       |                                                                              | <ul style="list-style-type: none"> <li>• Proportion of individuals with positive HCV RNA tests</li> <li>• Proportion of individuals linked to a first appointment</li> </ul>                                                              |
| <b>Burton et al., 2019<sup>17</sup></b> | Southeastern U.S. | Interventional | SUD program at a VA Medical Center; All Veterans with active SUD | 597 | Opt-in HCV screening in an integrated residential SUD program with HCV treatment clinics. | Referral to the ID clinic via consult while still in residential SUD program | <ul style="list-style-type: none"> <li>• Proportion of individuals screened for HCV</li> <li>• Proportion of individuals with positive HCV viral load tests</li> <li>• Proportion of individuals linked to a first appointment</li> </ul> |

|                                         |                             |                |                                                                                                                          |        |                                                                                                                                                                                                    |                                                                                                                                                       |                                                                                                                                                                                                                           |
|-----------------------------------------|-----------------------------|----------------|--------------------------------------------------------------------------------------------------------------------------|--------|----------------------------------------------------------------------------------------------------------------------------------------------------------------------------------------------------|-------------------------------------------------------------------------------------------------------------------------------------------------------|---------------------------------------------------------------------------------------------------------------------------------------------------------------------------------------------------------------------------|
|                                         |                             |                |                                                                                                                          |        |                                                                                                                                                                                                    |                                                                                                                                                       | <ul style="list-style-type: none"> <li>• Proportion of individuals with treatment initiation</li> <li>• Proportion of individuals with treatment completion</li> <li>• Proportion of individuals achieving SVR</li> </ul> |
| <b>Calner et al., 2019<sup>18</sup></b> | Boston, Massachusetts, U.S. | Interventional | Boston Medical Center (all settings: outpatient, inpatient and ED); Individuals with risk factors (baby boomers or PWID) | 28,435 | Utilization of a multi-purpose BPA (except in the inpatient setting) that fired to alert providers about eligible individuals. Opt-out HCV screening for individuals captured in the ED undergoing | Augmented linkage support services through a data analyst and public health navigators. Navigators contacted individuals with positive HCV RNA tests. | <ul style="list-style-type: none"> <li>• Proportion of individuals screened for HCV</li> <li>• Proportion of individuals with positive HCV antibody tests</li> </ul>                                                      |

|  |  |  |  |  |                                                                                            |  |                                                                                                                                                                                                                                                                                                                                                               |
|--|--|--|--|--|--------------------------------------------------------------------------------------------|--|---------------------------------------------------------------------------------------------------------------------------------------------------------------------------------------------------------------------------------------------------------------------------------------------------------------------------------------------------------------|
|  |  |  |  |  | <p>phlebotomy for any reason. Hospital-wide reflex testing for HCV RNA and genotyping.</p> |  | <ul style="list-style-type: none"> <li>• Proportion of individuals with positive HCV RNA tests</li> <li>• Proportion of individuals linked to a first appointment</li> <li>• Proportion of individuals with treatment initiation</li> <li>• Proportion of individuals with treatment completion</li> <li>• Proportion of individuals achieving SVR</li> </ul> |
|--|--|--|--|--|--------------------------------------------------------------------------------------------|--|---------------------------------------------------------------------------------------------------------------------------------------------------------------------------------------------------------------------------------------------------------------------------------------------------------------------------------------------------------------|

|                                            |                           |                               |                                                                         |        |                                                                                                    |                                                                                              |                                                                                                                                                                                                                                                                                                          |
|--------------------------------------------|---------------------------|-------------------------------|-------------------------------------------------------------------------|--------|----------------------------------------------------------------------------------------------------|----------------------------------------------------------------------------------------------|----------------------------------------------------------------------------------------------------------------------------------------------------------------------------------------------------------------------------------------------------------------------------------------------------------|
| <b>Castrejon et al., 2017<sup>19</sup></b> | Southern California, U.S. | Interventional                | Outpatient primary care clinics of UCLA healthcare system; Baby boomers | 19,606 | Incorporation of a CDS tool in the reminder health staff of HCV screening in eligible individuals. | Introduction of a HCV care coordinator to facilitate follow-up and linkage to care via phone | <ul style="list-style-type: none"> <li>• Proportion of individuals screened for HCV</li> <li>• Proportion of individuals with positive HCV antibody tests</li> <li>• Proportion of individuals with positive HCV RNA tests</li> <li>• Proportion of individuals linked to a first appointment</li> </ul> |
| <b>Citarella et al., 2020<sup>20</sup></b> | Campania region, Italy    | Observational (retrospective) | Outpatient general practices of the National                            | 3,210  | N/A                                                                                                | N/A                                                                                          | <ul style="list-style-type: none"> <li>• Proportion of individuals</li> </ul>                                                                                                                                                                                                                            |

|                                           |                     |                |                                                                                                                        |        |                                                                                                                                                                                                                                                                          |                                                                                                                                               |                                                                                                                                                                                                                                                                |
|-------------------------------------------|---------------------|----------------|------------------------------------------------------------------------------------------------------------------------|--------|--------------------------------------------------------------------------------------------------------------------------------------------------------------------------------------------------------------------------------------------------------------------------|-----------------------------------------------------------------------------------------------------------------------------------------------|----------------------------------------------------------------------------------------------------------------------------------------------------------------------------------------------------------------------------------------------------------------|
|                                           |                     |                | Health Services;<br>Adults ≥ 18 years old with known diagnosis of HCV infection or with risk factors for HCV infection |        |                                                                                                                                                                                                                                                                          |                                                                                                                                               | linked to a first appointment                                                                                                                                                                                                                                  |
| <b>Connoley et al., 2020<sup>21</sup></b> | London, England, UK | Interventional | All-male short-stay local prison; Newly incarcerated individuals                                                       | 12,964 | Phase 1 (Dec 2015 – Feb 2017): offering of dried blood spot testing at health evaluation occurring within 72 hours of entering prison. Phase 2 (March 2017 – May 2018): components of phase 1 + additional training of prison healthcare on delivering opt-out testing + | Phase 1: referral of HCV RNA cases to a CNS then review of cases by a MDT to decide on treatment initiation. Phase 2: direct referral to MDT. | <ul style="list-style-type: none"> <li>• Proportion of individuals screened for HCV</li> <li>• Proportion of individuals with positive HCV antibody tests</li> <li>• Proportion of individuals with positive HCV RNA tests</li> <li>• Proportion of</li> </ul> |

|                                        |                               |                |                                     |        |                                                                                                                                                                                                                                                |                                                                                |                                                                                                                                                                                                                         |
|----------------------------------------|-------------------------------|----------------|-------------------------------------|--------|------------------------------------------------------------------------------------------------------------------------------------------------------------------------------------------------------------------------------------------------|--------------------------------------------------------------------------------|-------------------------------------------------------------------------------------------------------------------------------------------------------------------------------------------------------------------------|
|                                        |                               |                |                                     |        | engaging prisoners outside their cell during other activities to reduce prisoner non-attendance + developing a wait-list to enable tracking prisoners who missed testing                                                                       |                                                                                | <p>individuals linked to a first appointment</p> <ul style="list-style-type: none"> <li>• Proportion of individuals with treatment initiation</li> </ul>                                                                |
| <b>Cowan et al., 2020<sup>22</sup></b> | New York City, New York, U.S. | Interventional | Urban ED; All adults ≥ 18 years old | 40,282 | Nontargeted opt-in HCV screening. Inclusion of a mandatory field for HCV testing assessment in the EHR. Reflex viral load for positive HCV antibody tests. Contact of individuals who initially declined testing or who had a life-threatening | Offering of follow-up with the Hepatology clinic located close to the hospital | <ul style="list-style-type: none"> <li>• Proportion of individuals screened for HCV</li> <li>• Proportion of individuals with positive HCV antibody tests</li> <li>• Proportion of individuals with positive</li> </ul> |

|                                          |                 |                |                                             |     |                                                                                              |     |                                                                                                                                                                                                                                                                                                                |
|------------------------------------------|-----------------|----------------|---------------------------------------------|-----|----------------------------------------------------------------------------------------------|-----|----------------------------------------------------------------------------------------------------------------------------------------------------------------------------------------------------------------------------------------------------------------------------------------------------------------|
|                                          |                 |                |                                             |     | emergency by a trained HE, by phone or telegram, to re-engage them in the healthcare system. |     | <p>HCV RNA tests</p> <ul style="list-style-type: none"> <li>• Proportion of individuals successfully contacted</li> <li>• Proportion of individuals linked to a first appointment</li> <li>• Proportion of individuals with treatment initiation</li> <li>• Proportion of individuals achieving SVR</li> </ul> |
| <b>Crowley et al., 2019<sup>23</sup></b> | Dublin, Ireland | Interventional | Urban male prison; Incarcerated individuals | 425 | Opt-in and peer-supported (trained prison-based health volunteers) HCV screening.            | N/A | <ul style="list-style-type: none"> <li>• Proportion of individuals screened for HCV</li> </ul>                                                                                                                                                                                                                 |

|  |  |  |  |  |                                                                          |  |                                                                                                                                                                                                                                                                                                                                                                            |
|--|--|--|--|--|--------------------------------------------------------------------------|--|----------------------------------------------------------------------------------------------------------------------------------------------------------------------------------------------------------------------------------------------------------------------------------------------------------------------------------------------------------------------------|
|  |  |  |  |  | Reflex HCV RNA and genotype testing for all positive HCV antibody tests. |  | <ul style="list-style-type: none"><li>• Proportion of individuals with positive HCV antibody tests</li><li>• Proportion of individuals with positive HCV RNA tests</li><li>• Proportion of individuals linked to a first appointment</li><li>• Proportion of individuals with treatment initiation</li><li>• Proportion of individuals with treatment completion</li></ul> |
|--|--|--|--|--|--------------------------------------------------------------------------|--|----------------------------------------------------------------------------------------------------------------------------------------------------------------------------------------------------------------------------------------------------------------------------------------------------------------------------------------------------------------------------|



|                                        |                            |     |                                                                                                                                                                                                             |        |                                                                                                                                                                                                                                                                                                                                    |     |                                                                                                                                                                                                                                                                                                          |
|----------------------------------------|----------------------------|-----|-------------------------------------------------------------------------------------------------------------------------------------------------------------------------------------------------------------|--------|------------------------------------------------------------------------------------------------------------------------------------------------------------------------------------------------------------------------------------------------------------------------------------------------------------------------------------|-----|----------------------------------------------------------------------------------------------------------------------------------------------------------------------------------------------------------------------------------------------------------------------------------------------------------|
|                                        |                            |     |                                                                                                                                                                                                             |        |                                                                                                                                                                                                                                                                                                                                    |     | <ul style="list-style-type: none"> <li>• Proportion of individuals reaching SVR</li> </ul>                                                                                                                                                                                                               |
| <b>Desai et al., 2020<sup>24</sup></b> | Dallas County, Texas, U.S. | RCT | A publicly funded integrated health system including 12 primary care clinics and specialty clinics; Baby boomers with at least 1 primary care visit within 5 years before RCT and no previous HCV screening | 12,386 | “Inreach” screening alone, defined as a visit-based HCV screening assisted by an EHR BPA + primary care provider and/or patient education vs “Inreach + Outreach” screening. “Outreach” screening consisted of a mailed low literacy letter in English and Spanish describing the risk of HCV infection, benefits and risks of HCV | N/A | <ul style="list-style-type: none"> <li>• Proportion of individuals screened for HCV</li> <li>• Proportion of individuals with positive HCV antibody tests</li> <li>• Proportion of individuals with positive HCV RNA tests</li> <li>• Proportion of individuals linked to a first appointment</li> </ul> |

|                                         |                        |                               |                                                                                                                                                                          |       |                                                                    |     |                                                                                                                                                                                                                                                                                      |
|-----------------------------------------|------------------------|-------------------------------|--------------------------------------------------------------------------------------------------------------------------------------------------------------------------|-------|--------------------------------------------------------------------|-----|--------------------------------------------------------------------------------------------------------------------------------------------------------------------------------------------------------------------------------------------------------------------------------------|
|                                         |                        |                               |                                                                                                                                                                          |       | screening, and a phone number to “schedule” the HCV antibody test. |     | <ul style="list-style-type: none"> <li>• Proportion of individuals with treatment initiation</li> </ul>                                                                                                                                                                              |
| <b>Dupont et al., 2020<sup>25</sup></b> | Atlanta, Georgia, U.S. | Observational (retrospective) | Urban safety-net health system comprised of a Primary Care Center at the main hospital and satellite clinics; Newly screened individuals with positive HCV antibody test | 7,137 | N/A                                                                | N/A | <ul style="list-style-type: none"> <li>• Proportion of individuals with of positive antibody test</li> <li>• Proportion of individuals with positive HCV RNA</li> <li>• Proportion of individuals linked to a first appointment</li> <li>• Proportion of individuals with</li> </ul> |

|                                       |                               |                |                                                                                                                                                                                                                                                                |     |     |                                                                                                                                                                              |                                                                                                                                                                                                                                                                                             |
|---------------------------------------|-------------------------------|----------------|----------------------------------------------------------------------------------------------------------------------------------------------------------------------------------------------------------------------------------------------------------------|-----|-----|------------------------------------------------------------------------------------------------------------------------------------------------------------------------------|---------------------------------------------------------------------------------------------------------------------------------------------------------------------------------------------------------------------------------------------------------------------------------------------|
|                                       |                               |                |                                                                                                                                                                                                                                                                |     |     |                                                                                                                                                                              | <p>treatment initiation</p> <ul style="list-style-type: none"> <li>• Proportion of individuals reaching SVR</li> </ul>                                                                                                                                                                      |
| <b>Ford et al., 2017<sup>26</sup></b> | New York City, New York, U.S. | Interventional | 4 community-based organizations: 2 organizations with on-site outpatient clinical care, harm reduction and social services and 2 organizations with harm reduction and syringe exchange programs with off-site medical care; Vulnerable populations, including | 388 | N/A | Patient navigation program: PNs supported individuals through medical evaluation, follow-up appointment accompaniment, preparation for DAA treatment and treatment adherence | <ul style="list-style-type: none"> <li>• Proportion of individuals linked to a first appointment</li> <li>• Proportion of individuals with treatment initiation</li> <li>• Proportion of individuals with treatment completion</li> <li>• Proportion of individuals reaching SVR</li> </ul> |

|                                            |                                                                                                |                |                                                                                                               |        |                                                                             |                                                                                                 |                                                                                                                                                                                                                                       |
|--------------------------------------------|------------------------------------------------------------------------------------------------|----------------|---------------------------------------------------------------------------------------------------------------|--------|-----------------------------------------------------------------------------|-------------------------------------------------------------------------------------------------|---------------------------------------------------------------------------------------------------------------------------------------------------------------------------------------------------------------------------------------|
|                                            |                                                                                                |                | PWID, people who experience homelessness, people with mental health disorders and people with HIV coinfection |        |                                                                             |                                                                                                 |                                                                                                                                                                                                                                       |
| <b>Galbraith et al., 2020<sup>27</sup></b> | Birmingham, Alabama; Oakland, California; Boston, Massachusetts; and Baltimore, Maryland; U.S. | Interventional | Four urban academic EDs; All adults ≥ 18 years old                                                            | 43,507 | Opt-out universal HCV screening, nurse-driven, using electronic EHR prompts | A dedicated LTCC delivered positive test results and facilitated referral to HCV infection care | <ul style="list-style-type: none"> <li>• Proportion of individuals screened for HCV</li> <li>• Proportion of individuals with positive HCV antibody tests</li> <li>• Proportion of individuals with positive HCV RNA tests</li> </ul> |

|                                        |                                                                                  |                |                                                                             |        |                                                                                                                                                                                                                              |     |                                                                                                                                                                                                                                                                                                                                                                      |
|----------------------------------------|----------------------------------------------------------------------------------|----------------|-----------------------------------------------------------------------------|--------|------------------------------------------------------------------------------------------------------------------------------------------------------------------------------------------------------------------------------|-----|----------------------------------------------------------------------------------------------------------------------------------------------------------------------------------------------------------------------------------------------------------------------------------------------------------------------------------------------------------------------|
| <b>Geboy et al., 2019<sup>28</sup></b> | Washington D.C.; Northern Virginia; Southern Maryland; Baltimore, Maryland; U.S. | Interventional | Primary care outpatient clinics of a large healthcare network; Baby boomers | 80,556 | Incorporation of a CDS tool in the EHR identifying individuals eligible for HCV screening. Automatic printing of a CDC HCV screening handout to encourage testing and provide educational support (as part of the CDS tool). | N/A | <ul style="list-style-type: none"> <li>• Proportion of individuals screened for HCV</li> <li>• Proportion of individuals with positive HCV antibody tests</li> <li>• Proportion of individuals with positive HCV RNA tests</li> <li>• Proportion of individuals successfully contacted</li> <li>• Proportion of individuals linked to a first appointment</li> </ul> |
|----------------------------------------|----------------------------------------------------------------------------------|----------------|-----------------------------------------------------------------------------|--------|------------------------------------------------------------------------------------------------------------------------------------------------------------------------------------------------------------------------------|-----|----------------------------------------------------------------------------------------------------------------------------------------------------------------------------------------------------------------------------------------------------------------------------------------------------------------------------------------------------------------------|

|                                         |              |                               |                                                                                               |     |     |     |                                                                                                                                                                                                                          |
|-----------------------------------------|--------------|-------------------------------|-----------------------------------------------------------------------------------------------|-----|-----|-----|--------------------------------------------------------------------------------------------------------------------------------------------------------------------------------------------------------------------------|
|                                         |              |                               |                                                                                               |     |     |     | <ul style="list-style-type: none"> <li>• Proportion of individuals with treatment initiation</li> <li>• Proportion of individuals with treatment completion</li> <li>• Proportion of individuals reaching SVR</li> </ul> |
| <b>Hachey et al., 2020<sup>29</sup></b> | Western U.S. | Observational (retrospective) | Eight rural clinics of the FQHCs; Individuals with HCV diagnosis and aware of their infection | 389 | N/A | N/A | <ul style="list-style-type: none"> <li>• Proportion of individuals with positive HCV viral load tests</li> <li>• Proportion of individuals with treatment initiation</li> </ul>                                          |

|                                          |                             |                |                                |     |                       |                                                                        |                                                                                                                                                                                                                                                                                                          |
|------------------------------------------|-----------------------------|----------------|--------------------------------|-----|-----------------------|------------------------------------------------------------------------|----------------------------------------------------------------------------------------------------------------------------------------------------------------------------------------------------------------------------------------------------------------------------------------------------------|
|                                          |                             |                |                                |     |                       |                                                                        | <ul style="list-style-type: none"> <li>• Proportion of individuals achieving SVR</li> </ul>                                                                                                                                                                                                              |
| <b>Hoenigl et al., 2019<sup>30</sup></b> | San Diego, California, U.S. | Interventional | Two academic EDs; Baby boomers | 905 | Opt-out HCV screening | Case manager disclosed HCV diagnosis and assisted with linkage to care | <ul style="list-style-type: none"> <li>• Proportion of individuals screened for HCV</li> <li>• Proportion of individuals with positive HCV antibody tests</li> <li>• Proportion of individuals with positive HCV RNA tests</li> <li>• Proportion of individuals linked to a first appointment</li> </ul> |

|                                       |                         |                |                                                                                                          |        |                                                                                                                                                                                                                                                                           |                                                                                                                                                                                                                                           |                                                                                                                                                                                                                                                                                                                                                                      |
|---------------------------------------|-------------------------|----------------|----------------------------------------------------------------------------------------------------------|--------|---------------------------------------------------------------------------------------------------------------------------------------------------------------------------------------------------------------------------------------------------------------------------|-------------------------------------------------------------------------------------------------------------------------------------------------------------------------------------------------------------------------------------------|----------------------------------------------------------------------------------------------------------------------------------------------------------------------------------------------------------------------------------------------------------------------------------------------------------------------------------------------------------------------|
| <b>Hunt et al., 2021<sup>31</sup></b> | Chicago, Illinois, U.S. | Interventional | Urban community safety-net teaching hospital; 2 cohorts: baby boomers and all adults $\geq 18$ years old | 21,018 | Expansion of available HCV screening program in 3 stages: Oct-Dec 2014 = targeted screening based on birth and risk factors, Dec 2014 – Aug 2016 = introduction of reflex HCV RNA test, Sep 2016 – Aug 2020 = universal screening only for individuals admitted to the ED | PN notified testing results to individuals, provided linkage-to-care services and addressed barriers to care: schedule of appointment for elastography and ID clinic, reschedule of appointments, arrangement of transportation if needed | <ul style="list-style-type: none"> <li>• Proportion of individuals screened for HCV</li> <li>• Proportion of individuals with positive HCV antibody tests</li> <li>• Proportion of individuals with positive HCV RNA tests</li> <li>• Proportion of individuals successfully contacted</li> <li>• Proportion of individuals linked to a first appointment</li> </ul> |
|---------------------------------------|-------------------------|----------------|----------------------------------------------------------------------------------------------------------|--------|---------------------------------------------------------------------------------------------------------------------------------------------------------------------------------------------------------------------------------------------------------------------------|-------------------------------------------------------------------------------------------------------------------------------------------------------------------------------------------------------------------------------------------|----------------------------------------------------------------------------------------------------------------------------------------------------------------------------------------------------------------------------------------------------------------------------------------------------------------------------------------------------------------------|



|                                        |                           |                               |                                                                                                                                         |       |                                                                                                            |                                                                                                                                              |                                                                                                                                                                                                                                             |
|----------------------------------------|---------------------------|-------------------------------|-----------------------------------------------------------------------------------------------------------------------------------------|-------|------------------------------------------------------------------------------------------------------------|----------------------------------------------------------------------------------------------------------------------------------------------|---------------------------------------------------------------------------------------------------------------------------------------------------------------------------------------------------------------------------------------------|
| <b>Im et al., 2021<sup>32</sup></b>    | Chicago, Illinois, U.S.   | Observational (retrospective) | Large, urban and tertiary university hospital; Adults ≥ 18 years old with positive HCV antibody tests during 3 years before study start | 1,570 | N/A                                                                                                        | N/A                                                                                                                                          | <ul style="list-style-type: none"> <li>• Proportion of individuals with positive HCV RNA tests</li> <li>• Proportion of individuals linked to a first appointment</li> <li>• Proportion of individuals with treatment initiation</li> </ul> |
| <b>Irvin et al., 2020<sup>33</sup></b> | Baltimore, Maryland, U.S. | Interventional                | Primary care sites; Baby boomers                                                                                                        | 3,250 | Modification of EHR clinic systems to allow for alerts to recommend HCV testing based on target population | Modification of EHR clinic systems to allow for alerts to flag individuals with positive HCV antibody or RNA tests not linked to care or who | <ul style="list-style-type: none"> <li>• Proportion of individuals screened for HCV</li> <li>• Proportion of individuals</li> </ul>                                                                                                         |

|  |  |  |  |  |  |                                                                                                                                  |                                                                                                                                                                                                                                                                                                                                                                                           |
|--|--|--|--|--|--|----------------------------------------------------------------------------------------------------------------------------------|-------------------------------------------------------------------------------------------------------------------------------------------------------------------------------------------------------------------------------------------------------------------------------------------------------------------------------------------------------------------------------------------|
|  |  |  |  |  |  | <p>dropped out of care.<br/>Transformation of clinical sites into HCV centers, led by an experienced HCV nurse practitioner.</p> | <p>with positive HCV antibody tests</p> <ul style="list-style-type: none"> <li>• Proportion of individuals with positive HCV RNA tests</li> <li>• Proportion of individuals successfully contacted</li> <li>• Proportion of individuals linked to a first appointment</li> <li>• Proportion of individuals with treatment initiation</li> <li>• Proportion of individuals with</li> </ul> |
|--|--|--|--|--|--|----------------------------------------------------------------------------------------------------------------------------------|-------------------------------------------------------------------------------------------------------------------------------------------------------------------------------------------------------------------------------------------------------------------------------------------------------------------------------------------------------------------------------------------|

|                                       |                            |                |                                                                                                                                                                         |        |                                                                                                                                                                                                               |                                                                                                                                                      |                                                                                                                                                                                                                                                                            |
|---------------------------------------|----------------------------|----------------|-------------------------------------------------------------------------------------------------------------------------------------------------------------------------|--------|---------------------------------------------------------------------------------------------------------------------------------------------------------------------------------------------------------------|------------------------------------------------------------------------------------------------------------------------------------------------------|----------------------------------------------------------------------------------------------------------------------------------------------------------------------------------------------------------------------------------------------------------------------------|
|                                       |                            |                |                                                                                                                                                                         |        |                                                                                                                                                                                                               |                                                                                                                                                      | <p>treatment completion</p> <ul style="list-style-type: none"> <li>• Proportion of individuals achieving SVR</li> </ul>                                                                                                                                                    |
| <b>Jain et al., 2019<sup>34</sup></b> | Dallas County, Texas, U.S. | Interventional | 12 primary care clinics in one health care system located in one county; Baby boomers with an outpatient visit with no prior HCV antibody, HCV RNA, or genotype testing | 34,093 | Patient and provider education. For patients, CDC flyers on HCV screening guidelines for Baby boomers were placed in waiting rooms. For physicians, a one-time in-person didact was performed at each clinic. | Algorithm driven BPA was implemented in primary care clinics and HCV clinic capacity was increased to link those who screened positive to treatment. | <ul style="list-style-type: none"> <li>• Proportion of individuals screened for HCV Prevalence of positive antibody test</li> <li>• Proportion of individuals with positive HCV antibody tests</li> <li>• Proportion of individuals with positive HCV RNA tests</li> </ul> |

|                                         |                    |              |                                                                                                                                 |        |                                     |                                                                                                                                                                                                                                                                                                                                                                                                            |                                                                                                                                                                                                                                                        |
|-----------------------------------------|--------------------|--------------|---------------------------------------------------------------------------------------------------------------------------------|--------|-------------------------------------|------------------------------------------------------------------------------------------------------------------------------------------------------------------------------------------------------------------------------------------------------------------------------------------------------------------------------------------------------------------------------------------------------------|--------------------------------------------------------------------------------------------------------------------------------------------------------------------------------------------------------------------------------------------------------|
|                                         |                    |              |                                                                                                                                 |        |                                     |                                                                                                                                                                                                                                                                                                                                                                                                            | <ul style="list-style-type: none"> <li>• Proportion of individuals linked to first appointment</li> </ul>                                                                                                                                              |
| <b>Jonas et al., 2016</b> <sup>35</sup> | Mid Atlantic, U.S. | Intervention | Integrated health care system; Baby boomers eligible for HCV Ab screening without documentation in the EMR of prior HCV testing | 11,200 | An algorithm driven BPA in the EHR. | The testing pathway includes HCV antibody (Ab), automatic HCV RNA for Ab-positive patients, coinfection and liver health tests, vibration-controlled transient elastography (VCTE), and a physician referral. This protocol granted approval for a nonphysician support staff member (at MAPMG, the HCV care coordinator), to execute a physician order if upstream HCV RNA tests return positive results. | <ul style="list-style-type: none"> <li>• Proportion of individuals with positive HCV antibody tests</li> <li>• Proportion of individuals with positive HCV RNA tests</li> <li>• Proportion of individuals successfully contacted</li> <li>•</li> </ul> |

|                                      |                                  |                |                                                                         |     |     |                                                                                                                                                                                                                                                                                                                                                                                                                                                                                              |                                                                                                                                                                                                                                                                                         |
|--------------------------------------|----------------------------------|----------------|-------------------------------------------------------------------------|-----|-----|----------------------------------------------------------------------------------------------------------------------------------------------------------------------------------------------------------------------------------------------------------------------------------------------------------------------------------------------------------------------------------------------------------------------------------------------------------------------------------------------|-----------------------------------------------------------------------------------------------------------------------------------------------------------------------------------------------------------------------------------------------------------------------------------------|
| Kempainen et al., 2020 <sup>36</sup> | Southern Karelia Region, Finland | Interventional | Region with largest prevalence of HCV; All HCV-antigen positive persons | 539 | N/A | National registry data was used to identify individuals. Those whose HCV RNA status was unknown were contacted by either telephone, letter or social media. Newspaper announcements and posters on addiction service sites invited individuals to be tested for HCV. For those with no contact information, relevant treatment services were used to reach them or to have the request forwarded to them. Contacted individuals were invited to visit the clinic and educated on disease and | <ul style="list-style-type: none"> <li>• Proportion of individuals with positive HCV RNA tests</li> <li>• Proportion of individuals successfully contacted</li> <li>• Proportion of individuals with treatment initiation</li> <li>• Proportion of individuals achieving SVR</li> </ul> |
|--------------------------------------|----------------------------------|----------------|-------------------------------------------------------------------------|-----|-----|----------------------------------------------------------------------------------------------------------------------------------------------------------------------------------------------------------------------------------------------------------------------------------------------------------------------------------------------------------------------------------------------------------------------------------------------------------------------------------------------|-----------------------------------------------------------------------------------------------------------------------------------------------------------------------------------------------------------------------------------------------------------------------------------------|

|                                      |                                 |                               |                                                                                               |        |     |                                                                                                                                                                                                                                                                                                                                                                 |                                                                                                                                                   |
|--------------------------------------|---------------------------------|-------------------------------|-----------------------------------------------------------------------------------------------|--------|-----|-----------------------------------------------------------------------------------------------------------------------------------------------------------------------------------------------------------------------------------------------------------------------------------------------------------------------------------------------------------------|---------------------------------------------------------------------------------------------------------------------------------------------------|
|                                      |                                 |                               |                                                                                               |        |     | <p>national treatment policies. Information about those who could not be reached was provided to the local health center nearest to the individuals last know residence instructing them to test the individual for HCV if they visited the center. All health service providers in the region were notified about and enrolled in the program and trained.</p> |                                                                                                                                                   |
| <b>Kim et al., 2019<sup>37</sup></b> | San Francisco, California, U.S. | Observational (retrospective) | 12 adult primary care clinics within a large city's department of public health; Baby boomers | 34,810 | N/A | N/A                                                                                                                                                                                                                                                                                                                                                             | <ul style="list-style-type: none"> <li>• Proportion of individuals screened for HCV</li> <li>• Proportion of individuals with positive</li> </ul> |

|                                          |                          |                               |                                                                                |       |     |     |                                                                                                                                                                                                                                                       |
|------------------------------------------|--------------------------|-------------------------------|--------------------------------------------------------------------------------|-------|-----|-----|-------------------------------------------------------------------------------------------------------------------------------------------------------------------------------------------------------------------------------------------------------|
|                                          |                          |                               |                                                                                |       |     |     | <p>HCV antibody tests</p> <ul style="list-style-type: none"> <li>• Proportion of individuals with positive HCV RNA tests</li> <li>• Proportion of individuals with treatment initiation</li> <li>• Proportion of individuals achieving SVR</li> </ul> |
| <b>Kronfli et al., 2019<sup>38</sup></b> | Montréal, Quebec, Canada | Observational (retrospective) | Areas largest provincial prison; Male prisoners aged >18 who requested testing | 4,931 | N/A | N/A | <ul style="list-style-type: none"> <li>• Proportion of individuals screened for HCV</li> <li>• Proportion of individuals with positive HCV</li> </ul>                                                                                                 |

|                                      |               |                |                                                              |       |                                                          |                                                                                   |                                                                                                                                                                                                                                                                                                             |
|--------------------------------------|---------------|----------------|--------------------------------------------------------------|-------|----------------------------------------------------------|-----------------------------------------------------------------------------------|-------------------------------------------------------------------------------------------------------------------------------------------------------------------------------------------------------------------------------------------------------------------------------------------------------------|
|                                      |               |                |                                                              |       |                                                          |                                                                                   | antibody tests <ul style="list-style-type: none"> <li>• Proportion of individuals with positive HCV RNA tests</li> <li>• Proportion of individuals linked to first appointment</li> <li>• Proportion of individuals with treatment initiation</li> <li>• Proportion of individuals achieving SVR</li> </ul> |
| <b>Lee et al., 2020<sup>39</sup></b> | Alabama, U.S. | Interventional | Community clinics and outreach venues across one U.S. state; | 8,947 | Opt-out HCV point-of-care (POC) testing or HCV screening | Linkage coordinator attempted to establish contact with all HCV-antibody-positive | <ul style="list-style-type: none"> <li>• Proportion of individuals screened for HCV</li> </ul>                                                                                                                                                                                                              |



|                                        |        |                |                                                                         |     |                                                                                    |                                                                                                                                                                                                                                                                                                                                                                        |                                                                                                                                                                                 |
|----------------------------------------|--------|----------------|-------------------------------------------------------------------------|-----|------------------------------------------------------------------------------------|------------------------------------------------------------------------------------------------------------------------------------------------------------------------------------------------------------------------------------------------------------------------------------------------------------------------------------------------------------------------|---------------------------------------------------------------------------------------------------------------------------------------------------------------------------------|
|                                        |        |                | High-Risk Alabamians                                                    |     | prompts in the EHR.                                                                | individuals who underwent POC testing, and all HCV-viremic individuals who underwent EMR-based reflex testing. By means of phone calls and in person, the linkage coordinator delivered HCV confirmatory PCR test results, obtained further risk information, and assisted with linkage to substance use counselling, when applicable, and to an HCV treatment center. | <ul style="list-style-type: none"> <li>• Proportion of individuals with positive HCV antibody tests</li> <li>• Proportion of individuals linked to first appointment</li> </ul> |
| <b>Lions et al., 2020<sup>40</sup></b> | France | Interventional | HIV-outpatient clinic; Individuals aged $\geq 18$ who were HIV-infected | 898 | In the screening phase, according to French guidelines, HCV serology was performed | The therapeutic component of the program included information and a treatment proposal for all patients with positive HCV-RNA quantification.                                                                                                                                                                                                                          | <ul style="list-style-type: none"> <li>• Proportion of individuals screened for HCV</li> <li>• Proportion of</li> </ul>                                                         |

|  |  |  |  |                                                                                                                                                                                                                                                                                                                                                                                                                   |                                                                                                                                                                                                                                                                                 |
|--|--|--|--|-------------------------------------------------------------------------------------------------------------------------------------------------------------------------------------------------------------------------------------------------------------------------------------------------------------------------------------------------------------------------------------------------------------------|---------------------------------------------------------------------------------------------------------------------------------------------------------------------------------------------------------------------------------------------------------------------------------|
|  |  |  |  | <p>for patients with a previous negative result for more than 12 months prior or an unavailable test. In cases of positive serology, HCV RNA was quantified. For cured HCV patients after HCV treatment, HCV RNA was systematically controlled if the previous HCV RNA quantification was over 6 months or in case of HCV reinfection risk factors. For patients who spontaneously cleared HCV infection, HCV</p> | <p>individuals with positive HCV antibody tests</p> <ul style="list-style-type: none"> <li>• Proportion of individuals with positive HCV RNA tests</li> <li>• Proportion of individuals with treatment initiation</li> <li>• Proportion of individuals achieving SVR</li> </ul> |
|--|--|--|--|-------------------------------------------------------------------------------------------------------------------------------------------------------------------------------------------------------------------------------------------------------------------------------------------------------------------------------------------------------------------------------------------------------------------|---------------------------------------------------------------------------------------------------------------------------------------------------------------------------------------------------------------------------------------------------------------------------------|

|                                     |                          |                               |                                                                                                                                                        |       |                                                                             |     |                                                                                                                                                                                                                                                                                                        |
|-------------------------------------|--------------------------|-------------------------------|--------------------------------------------------------------------------------------------------------------------------------------------------------|-------|-----------------------------------------------------------------------------|-----|--------------------------------------------------------------------------------------------------------------------------------------------------------------------------------------------------------------------------------------------------------------------------------------------------------|
|                                     |                          |                               |                                                                                                                                                        |       | RNA was performed if the precedent test occurred more than 12 months prior. |     |                                                                                                                                                                                                                                                                                                        |
| <b>Ma et al., 2019<sup>41</sup></b> | St Louis, Missouri, U.S. | Observational (retrospective) | University infectious disease clinic; Individuals aged $\geq 18$ who were HIV-infected with active chronic HCV infection and $\geq 1$ follow-up visits | 1,949 | N/A                                                                         | N/A | <ul style="list-style-type: none"> <li>• Proportion of individuals screened for HCV</li> <li>• Proportion of individuals with positive HCV antibody tests</li> <li>• Proportion of individuals with positive HCV RNA tests</li> <li>• Proportion of individuals linked to first appointment</li> </ul> |

|                                          |       |                |                                                              |     |                                                                        |                                                                                                                                                                               |                                                                                                                                                                                                                           |
|------------------------------------------|-------|----------------|--------------------------------------------------------------|-----|------------------------------------------------------------------------|-------------------------------------------------------------------------------------------------------------------------------------------------------------------------------|---------------------------------------------------------------------------------------------------------------------------------------------------------------------------------------------------------------------------|
|                                          |       |                |                                                              |     |                                                                        |                                                                                                                                                                               | <ul style="list-style-type: none"> <li>• Proportion of individuals with treatment initiation</li> <li>• Proportion of individuals with treatment completion</li> <li>• Proportion of individuals achieving SVR</li> </ul> |
| <b>Messina et al., 2020<sup>42</sup></b> | Italy | Interventional | Substance use disorder facilities; Individuals who use drugs | 593 | A diagnostic protocol for HCV infection among patients in the facility | A fast path to accessing the infectious disease unit where DAAs were started the day of first visit and a protocol for follow-up during and after DAA treatment was followed. | <ul style="list-style-type: none"> <li>• Proportion of individuals screened for HCV</li> <li>• Proportion of individuals with positive HCV antibody tests</li> </ul>                                                      |

|                                         |                        |                               |                                                                                         |        |     |     |                                                                                                                                                                                                                                                  |
|-----------------------------------------|------------------------|-------------------------------|-----------------------------------------------------------------------------------------|--------|-----|-----|--------------------------------------------------------------------------------------------------------------------------------------------------------------------------------------------------------------------------------------------------|
|                                         |                        |                               |                                                                                         |        |     |     | <ul style="list-style-type: none"> <li>• Proportion of individuals with HCV RNA testing</li> <li>• Proportion of individuals with treatment initiation</li> </ul>                                                                                |
| <b>Miller et al., 2020<sup>43</sup></b> | Atlanta, Georgia, U.S. | Observational (retrospective) | Urban health system EHR; Living individuals tested for or identified with HCV infection | 72,745 | N/A | N/A | <ul style="list-style-type: none"> <li>• Proportion of individuals with positive HCV antibody tests</li> <li>• Proportion of individuals with positive HCV RNA tests</li> <li>• Proportion of individuals linked to first appointment</li> </ul> |

|                                        |    |                |                                                  |       |                                                                                                                                                                                                                                                     |                                                                                                                                                                                                                                                                                                                                   |                                                                                                                                                                                                                                       |
|----------------------------------------|----|----------------|--------------------------------------------------|-------|-----------------------------------------------------------------------------------------------------------------------------------------------------------------------------------------------------------------------------------------------------|-----------------------------------------------------------------------------------------------------------------------------------------------------------------------------------------------------------------------------------------------------------------------------------------------------------------------------------|---------------------------------------------------------------------------------------------------------------------------------------------------------------------------------------------------------------------------------------|
|                                        |    |                |                                                  |       |                                                                                                                                                                                                                                                     |                                                                                                                                                                                                                                                                                                                                   | <ul style="list-style-type: none"> <li>• Proportion of individuals with treatment initiation</li> <li>• Proportion of individuals achieving SVR</li> </ul>                                                                            |
| <b>Morey et al., 2019<sup>44</sup></b> | UK | Interventional | Two large male prisons; Incarcerated individuals | 4,280 | Individuals were offered dry blood spot testing at prison reception with confirmatory HCV RNA testing. Positive antibody tests with negative RNA tests were confirmed with venous blood testing. Those with negative tests were informed by letter. | Individuals with positive HCV RNA tests were recalled within 10 days for venous samples to measure HCV viral load and genotype. All confirmed as HCV RNA positive were referred for treatment with counselling and offered an assessment from the weekly on-site clinics with viral hepatitis nurse specialist. Telemedicine with | <ul style="list-style-type: none"> <li>• Proportion of individuals screened for HCV</li> <li>• Proportion of individuals with positive HCV antibody tests</li> <li>• Proportion of individuals with positive HCV RNA tests</li> </ul> |

|                                         |                       |                             |                                                                                          |     |     |                                                                                                                                                                                                                                                               |                                                                                                                                                                                                                                                                                            |
|-----------------------------------------|-----------------------|-----------------------------|------------------------------------------------------------------------------------------|-----|-----|---------------------------------------------------------------------------------------------------------------------------------------------------------------------------------------------------------------------------------------------------------------|--------------------------------------------------------------------------------------------------------------------------------------------------------------------------------------------------------------------------------------------------------------------------------------------|
|                                         |                       |                             |                                                                                          |     |     | <p>hepatology consultant determined treatment. A multi-disciplinary team met and reviewed each case. Those with short sentences precluding commencement of treatment in prison were provided written information with details on community HCV treatment.</p> | <ul style="list-style-type: none"> <li>• Proportion of individuals linked to first appointment</li> <li>• Proportion of individuals with treatment initiation</li> <li>• Proportion of individuals with treatment completion</li> <li>• Proportion of individuals achieving SVR</li> </ul> |
| <b>Morris et al., 2020<sup>45</sup></b> | Queensland, Australia | Observational (prospective) | Community-based health service (a not-for-profit alcohol and other drug health service); | 476 | N/A | N/A                                                                                                                                                                                                                                                           | <ul style="list-style-type: none"> <li>• Proportion of individuals with treatment initiation</li> </ul>                                                                                                                                                                                    |

|                                        |      |                               |                                                                                                                                                      |           |     |     |                                                                                                                                                                                                                                  |
|----------------------------------------|------|-------------------------------|------------------------------------------------------------------------------------------------------------------------------------------------------|-----------|-----|-----|----------------------------------------------------------------------------------------------------------------------------------------------------------------------------------------------------------------------------------|
|                                        |      |                               | PWID with confirmed HCV diagnosis                                                                                                                    |           |     |     | <ul style="list-style-type: none"> <li>• Proportion of individuals with treatment completion</li> <li>• Proportion of individuals achieving SVR</li> </ul>                                                                       |
| <b>Noska et al., 2017<sup>46</sup></b> | U.S. | Observational (retrospective) | VHA's Corporate Data Warehouse and HCV Clinical Case Registry data; Veterans in VHA care experiencing homelessness and not experiencing homelessness | 5,667,452 | N/A | N/A | <ul style="list-style-type: none"> <li>• Proportion of individuals with positive HCV antibody tests</li> <li>• Proportion of individuals with treatment initiation</li> <li>• Proportion of individuals achieving SVR</li> </ul> |



|                                            |                  |                               |                                                                                                   |       |                                                                                                                                                                                                                                                                                             |                                                                   |                                                                                                                                                                                                                                       |
|--------------------------------------------|------------------|-------------------------------|---------------------------------------------------------------------------------------------------|-------|---------------------------------------------------------------------------------------------------------------------------------------------------------------------------------------------------------------------------------------------------------------------------------------------|-------------------------------------------------------------------|---------------------------------------------------------------------------------------------------------------------------------------------------------------------------------------------------------------------------------------|
| <b>O'Connell et al., 2016<sup>47</sup></b> | Dublin, Ireland  | Interventional                | Urban emergency department; Individuals aged $\geq 18$ with the capacity to consent were included | 8,839 | Opt-out testing of all individuals with blood samples drawn as part of routine clinical care at no additional cost. Posters and leaflets informing individuals of opt-out testing were provided. Individuals with positive antibody tests were contacted 3 working days after the ED visit. | Linkage to care where necessary was coordinated by the study team | <ul style="list-style-type: none"> <li>• Proportion of individuals screened for HCV</li> <li>• Proportion of individuals with positive HCV antibody tests</li> <li>• Proportion of individuals with positive HCV RNA tests</li> </ul> |
| <b>Page et al., 2017<sup>48</sup></b>      | New Mexico, U.S. | Observational (retrospective) | Academic health science center prenatal care clinic; Pregnant women who had a self-               | 190   | N/A                                                                                                                                                                                                                                                                                         | N/A                                                               | <ul style="list-style-type: none"> <li>• Proportion of individuals screened for HCV</li> <li>• Proportion of individuals</li> </ul>                                                                                                   |

|                                           |             |                |                                                                                                                                                            |        |     |                                                                                                                                                                                                                                                                |                                                                                                                                                                                                                      |
|-------------------------------------------|-------------|----------------|------------------------------------------------------------------------------------------------------------------------------------------------------------|--------|-----|----------------------------------------------------------------------------------------------------------------------------------------------------------------------------------------------------------------------------------------------------------------|----------------------------------------------------------------------------------------------------------------------------------------------------------------------------------------------------------------------|
|                                           |             |                | reported history of opioid use, were on opioid agonist pharmacotherapy and/or who had drug screens that were positive for opioids, and were aged $\geq 18$ |        |     |                                                                                                                                                                                                                                                                | <ul style="list-style-type: none"> <li>with positive HCV antibody tests</li> <li>• Proportion of individuals with positive HCV RNA tests</li> </ul>                                                                  |
| <b>Ponziani et al., 2021<sup>49</sup></b> | Rome, Italy | Interventional | Large tertiary care center; Individuals tested for HCV antibodies during routine pre-operative assessment                                                  | 12,246 | N/A | All HCV antibody positive individuals identified in routine pre-operative assessment but without documented HCV RNA test results were identified then by telephone and email contacts were recalled for further diagnostic tests (i.e., HCV-RNA) or treatment. | <ul style="list-style-type: none"> <li>• Proportion of individuals with positive HCV antibody tests</li> <li>• Proportion of individuals with positive HCV RNA tests</li> <li>• Proportion of individuals</li> </ul> |

|                                       |                              |                |                                                                                                                                                                                                                       |     |                                                                                                                                                                |                                                                                                                                                                                                                                                                                                                                                      |                                                                                                                                                                                                                                                                              |
|---------------------------------------|------------------------------|----------------|-----------------------------------------------------------------------------------------------------------------------------------------------------------------------------------------------------------------------|-----|----------------------------------------------------------------------------------------------------------------------------------------------------------------|------------------------------------------------------------------------------------------------------------------------------------------------------------------------------------------------------------------------------------------------------------------------------------------------------------------------------------------------------|------------------------------------------------------------------------------------------------------------------------------------------------------------------------------------------------------------------------------------------------------------------------------|
|                                       |                              |                |                                                                                                                                                                                                                       |     |                                                                                                                                                                |                                                                                                                                                                                                                                                                                                                                                      | <p>successfully contacted</p> <ul style="list-style-type: none"> <li>• Proportion of individuals with treatment initiation</li> </ul>                                                                                                                                        |
| <b>Rizk et al., 2019<sup>50</sup></b> | New Haven, Connecticut, U.S. | Interventional | Academically affiliated, hospital-based HIV specialty clinic; Individuals aged $\geq 18$ with documented HIV infection and chronic HCV (reactive HCV antibody with detectable HCV RNA) with no previous DAA treatment | 173 | Clinic protocol was for all patients to receive HCV antibody testing after enrollment and to conduct confirmatory testing of those who test antibody positive. | Multidisciplinary team that focused on the onsite management of HCV care composed of 3 specially-trained physicians, 1 physician assistant, 1 nurse, 1-2 pharmacists and data managers. Each team member had specific roles in the process and all met regularly to review progress. Standardized screening, referral, and treatment algorithms were | <ul style="list-style-type: none"> <li>• Proportion of individuals linked to first appointment</li> <li>• Proportion of individuals with treatment initiation</li> <li>• Proportion of individuals with treatment completion</li> <li>• Proportion of individuals</li> </ul> |

|                                                          |                          |                       |                                                    |                |                                                                                           |                                                                                                                                                                                                                                                                                           |                                                                                                                                                       |
|----------------------------------------------------------|--------------------------|-----------------------|----------------------------------------------------|----------------|-------------------------------------------------------------------------------------------|-------------------------------------------------------------------------------------------------------------------------------------------------------------------------------------------------------------------------------------------------------------------------------------------|-------------------------------------------------------------------------------------------------------------------------------------------------------|
|                                                          |                          |                       |                                                    |                |                                                                                           | <p>adopted. Uniform EPIC templates were created for initial and follow-up evaluations that contained all pertinent HCV-specific information. Enhanced outreach via phone calls were made to untreated patients. Some patients' adherence was tracked using an ingestible sensor pill.</p> | <p>achieving SVR</p>                                                                                                                                  |
| <p><b>Rodriguez-Watson et al., 2021<sup>51</sup></b></p> | <p>Mid-Atlantic U.S.</p> | <p>Interventional</p> | <p>Integrated health care system; Baby boomers</p> | <p>506,070</p> | <p>Automated screening alerts for individuals as they are registered for appointments</p> | <p>Care pathway was initiated by a unique pathway laboratory code that first initiated an HCV antibody testing order the led to reflex laboratory orders for positive HCV antibody results and subsequent</p>                                                                             | <ul style="list-style-type: none"> <li>• Proportion of individuals screened for HCV</li> <li>• Proportion of individuals with positive HCV</li> </ul> |

|                                            |                           |                |                                                                                                                                    |     |     |                                                                                                                                                                                                                                                                                                 |                                                                                                                                                                                                                         |
|--------------------------------------------|---------------------------|----------------|------------------------------------------------------------------------------------------------------------------------------------|-----|-----|-------------------------------------------------------------------------------------------------------------------------------------------------------------------------------------------------------------------------------------------------------------------------------------------------|-------------------------------------------------------------------------------------------------------------------------------------------------------------------------------------------------------------------------|
|                                            |                           |                |                                                                                                                                    |     |     | orders for a care coordinator who facilitated diagnosis communication and engagement in follow-up care.                                                                                                                                                                                         | antibody tests <ul style="list-style-type: none"> <li>• Proportion of individuals with positive HCV RNA tests</li> <li>• Proportion of individuals successfully contacted</li> </ul>                                    |
| <b>Rosecrans et al., 2020<sup>52</sup></b> | Baltimore, Maryland, U.S. | Interventional | Two free large city health department community sexual health clinics; Patients accessing care at a community sexual health clinic | 560 | N/A | All HCV RNA positive individuals were contacted by the study case manager who performed needs assessments and linked individual to resources (insurance, primary care, substance use disorder treatment, transportation and housing) and linked individual to HCV care under a clinician at the | <ul style="list-style-type: none"> <li>• Proportion of individuals screened for HCV</li> <li>• Proportion of individuals with positive HCV antibody tests</li> <li>• Proportion of individuals with positive</li> </ul> |

|  |  |  |  |  |                                                                                                                                                                                                                                                                                                                                                                                                                                                                        |                                                                                                                                                                                                                                                  |
|--|--|--|--|--|------------------------------------------------------------------------------------------------------------------------------------------------------------------------------------------------------------------------------------------------------------------------------------------------------------------------------------------------------------------------------------------------------------------------------------------------------------------------|--------------------------------------------------------------------------------------------------------------------------------------------------------------------------------------------------------------------------------------------------|
|  |  |  |  |  | <p>health department. Clinician educated individual on HCV. Individuals who could not be contacted were referred to a linkage to care team for field outreach. A specialty pharmacy processed prior authorization approvals for HCV prescriptions. Those not meeting prior authorization criteria were assisted with applications for free medication through pharmaceutical assistance programs. Individuals receiving HCV treatment met monthly with a nurse for</p> | <p>HCV RNA tests</p> <ul style="list-style-type: none"> <li>• Proportion of individuals linked to first appointment</li> <li>• Proportion of individuals with treatment initiation</li> <li>• Proportion of individuals achieving SVR</li> </ul> |
|--|--|--|--|--|------------------------------------------------------------------------------------------------------------------------------------------------------------------------------------------------------------------------------------------------------------------------------------------------------------------------------------------------------------------------------------------------------------------------------------------------------------------------|--------------------------------------------------------------------------------------------------------------------------------------------------------------------------------------------------------------------------------------------------|

|                                       |               |                |                                                                                                                                              |     |                                                                                                                                           |                                                                                                                                                                                                                 |                                                                                                                                                                                                                                                                                            |
|---------------------------------------|---------------|----------------|----------------------------------------------------------------------------------------------------------------------------------------------|-----|-------------------------------------------------------------------------------------------------------------------------------------------|-----------------------------------------------------------------------------------------------------------------------------------------------------------------------------------------------------------------|--------------------------------------------------------------------------------------------------------------------------------------------------------------------------------------------------------------------------------------------------------------------------------------------|
|                                       |               |                |                                                                                                                                              |     |                                                                                                                                           | adherence counseling and blood work and were given a treatment calendar.                                                                                                                                        |                                                                                                                                                                                                                                                                                            |
| <b>Ryan et al., 2021<sup>53</sup></b> | Madrid, Spain | Interventional | Encampment where 90% of illicit drugs in the region are sold; Individuals aged >18 who use drugs and entered the encampment from the outside | 529 | Mobile unit went to the shantytown and collected fingerstick blood samples. This service was offered to everyone entering the encampment. | Those with positive HCV RNA tests were contacted and referred to specialized health centers. A patient navigator accompanied the individual to the hospital appointment where they were prescribed HCV therapy. | <ul style="list-style-type: none"> <li>• Proportion of individuals with positive HCV antibody tests</li> <li>• Proportion of individuals with positive HCV RNA tests</li> <li>• Proportion of individuals successfully contacted</li> <li>• Proportion of individuals linked to</li> </ul> |

|                                                    |                               |                |                                                                                                                                |        |                                                          |                                                                                                                                                  |                                                                                                                                                                                         |
|----------------------------------------------------|-------------------------------|----------------|--------------------------------------------------------------------------------------------------------------------------------|--------|----------------------------------------------------------|--------------------------------------------------------------------------------------------------------------------------------------------------|-----------------------------------------------------------------------------------------------------------------------------------------------------------------------------------------|
|                                                    |                               |                |                                                                                                                                |        |                                                          |                                                                                                                                                  | <ul style="list-style-type: none"> <li>• first appointment</li> <li>• Proportion of individuals with treatment initiation</li> <li>• Proportion of individuals achieving SVR</li> </ul> |
| <b>Saab et al., 2019<sup>54</sup></b>              | Los Angeles, California, U.S. | Interventional | Large university hospital healthcare system; Individuals who had previously used injection drugs and who were screened for HCV | 17,512 | N/A                                                      | Coordinators recommended confirmatory HCV RNA testing w/genotype assessment to patients' providers and offered to facilitate clinic appointment. | <ul style="list-style-type: none"> <li>• Proportion of individuals with positive HCV antibody tests</li> <li>• Proportion of individuals linked to first appointment</li> </ul>         |
| <b>Schechter-Perkins et al., 2018<sup>55</sup></b> | Boston, Massachusetts, U.S.   | Interventional | Emergency department in New England's                                                                                          | 12,852 | A nontargeted, opt-out ED HCV screening (linkage-to-care | Physicians provided preliminary antibody screening                                                                                               | <ul style="list-style-type: none"> <li>• Proportion of individuals</li> </ul>                                                                                                           |



|  |  |  |                                                                                                                                                                                         |                                                                                                                                                                                                                                                                                                                                                                                                                       |                                                                                                                                                                                                                                                                                                                                                                                                                                                                                                              |                                                                                                                                                                                                                                                                                |
|--|--|--|-----------------------------------------------------------------------------------------------------------------------------------------------------------------------------------------|-----------------------------------------------------------------------------------------------------------------------------------------------------------------------------------------------------------------------------------------------------------------------------------------------------------------------------------------------------------------------------------------------------------------------|--------------------------------------------------------------------------------------------------------------------------------------------------------------------------------------------------------------------------------------------------------------------------------------------------------------------------------------------------------------------------------------------------------------------------------------------------------------------------------------------------------------|--------------------------------------------------------------------------------------------------------------------------------------------------------------------------------------------------------------------------------------------------------------------------------|
|  |  |  | <p>largest safety net hospital; All patients who presented to the ED and underwent phlebotomy, at least 13 years old who did not have a prior complete HCV panel result in the EHR.</p> | <p>[LTC] program) Best Practice Advisory (BPA) alerted providers (nurse, nurse practitioner, physician, physician's assistant) when any phlebotomy order was entered into the EHR that the patient was eligible for HCV screening. ED providers followed a script in which they were conducting the medical history. BPA generated order labels. Nurses, residents and faculty were trained for the study. Onsite</p> | <p>results when available to patients still in the ED. Experienced patient care navigators were hired by the infectious disease program and extensively trained. The linkage navigators contacted and gave patients a CDC fact sheet about HCV. When patients had already left the ED, then program staff contacted the patient with results via telephone. Public health navigators attempted to contact all patients to give them positive test results and to link them to a treating provider at the</p> | <p>with positive HCV antibody tests</p> <ul style="list-style-type: none"> <li>• Proportion of individuals with positive HCV RNA tests</li> <li>• Proportion of individuals successfully contacted</li> <li>• Proportion of individuals linked to first appointment</li> </ul> |
|--|--|--|-----------------------------------------------------------------------------------------------------------------------------------------------------------------------------------------|-----------------------------------------------------------------------------------------------------------------------------------------------------------------------------------------------------------------------------------------------------------------------------------------------------------------------------------------------------------------------------------------------------------------------|--------------------------------------------------------------------------------------------------------------------------------------------------------------------------------------------------------------------------------------------------------------------------------------------------------------------------------------------------------------------------------------------------------------------------------------------------------------------------------------------------------------|--------------------------------------------------------------------------------------------------------------------------------------------------------------------------------------------------------------------------------------------------------------------------------|

|  |  |  |  |                                                                                                                                                                           |                                                                                                                                                                                                                                                                                                                                                                                                                                                                                                |
|--|--|--|--|---------------------------------------------------------------------------------------------------------------------------------------------------------------------------|------------------------------------------------------------------------------------------------------------------------------------------------------------------------------------------------------------------------------------------------------------------------------------------------------------------------------------------------------------------------------------------------------------------------------------------------------------------------------------------------|
|  |  |  |  | <p>pathway was developed to provide antibody screening with reflex testing for HCV RNA and to genotype those specimens identified as being HCV antibody seropositive.</p> | <p>medical center. Hospitalized patients were contacted during their admission. Navigators attempted to reach patients 4 times by telephone, after which they attempted to contact patients via their emergency contact phone number and/or their primary care provider, and simultaneously sent a certified letter to the patient's listed address. When the navigator successfully contacted a patient (s)he provided test results and scheduled a first visit appointment with either a</p> |
|--|--|--|--|---------------------------------------------------------------------------------------------------------------------------------------------------------------------------|------------------------------------------------------------------------------------------------------------------------------------------------------------------------------------------------------------------------------------------------------------------------------------------------------------------------------------------------------------------------------------------------------------------------------------------------------------------------------------------------|

|                                         |                  |                             |                                                                                                                                     |         |                                                                                                                                                                   |                                                                                                                                                                                                                                                                                             |                                                                                                                                                       |
|-----------------------------------------|------------------|-----------------------------|-------------------------------------------------------------------------------------------------------------------------------------|---------|-------------------------------------------------------------------------------------------------------------------------------------------------------------------|---------------------------------------------------------------------------------------------------------------------------------------------------------------------------------------------------------------------------------------------------------------------------------------------|-------------------------------------------------------------------------------------------------------------------------------------------------------|
|                                         |                  |                             |                                                                                                                                     |         |                                                                                                                                                                   | physician or nurse practitioner in general internal medicine, gastroenterology, infectious disease, or addiction services, according to an algorithm developed with outpatient clinicians. The navigators repeated their outreach attempts for patients who missed their first appointment. |                                                                                                                                                       |
| <b>Scott et al., 2021</b> <sup>56</sup> | Washington, U.S. | Observational (prospective) | Three community health centers, three large multi-clinic health care systems, and an HCV patient education and advocacy group; Baby | 232,214 | Establishment of a population-based public health and health care collaboration dedicated to HCV testing and treatment; Identification and hepatitis C testing of | Development of a data system to integrate laboratory and clinical data into public health surveillance records; Monitored patients along the care cascade and provide case management to                                                                                                    | <ul style="list-style-type: none"> <li>• Proportion of individuals screened for HCV</li> <li>• Proportion of individuals with positive HCV</li> </ul> |

|                                          |                |                |                                                                                                                                                                                                                                                                                |     |                                                                                                                                                                                                                                                                                                                                          |                                                                                                                                                                                                                                                                                                                                                                       |                                                                                                                                                                                                                                                                                                           |
|------------------------------------------|----------------|----------------|--------------------------------------------------------------------------------------------------------------------------------------------------------------------------------------------------------------------------------------------------------------------------------|-----|------------------------------------------------------------------------------------------------------------------------------------------------------------------------------------------------------------------------------------------------------------------------------------------------------------------------------------------|-----------------------------------------------------------------------------------------------------------------------------------------------------------------------------------------------------------------------------------------------------------------------------------------------------------------------------------------------------------------------|-----------------------------------------------------------------------------------------------------------------------------------------------------------------------------------------------------------------------------------------------------------------------------------------------------------|
|                                          |                |                | boomers or those with a HCV related diagnosis code, positive HCV laboratory test, or prescribed a medication for HCV residing in one highly populated county and having at least one visit to a participating primary care or liver specialty clinic during the project period |     | eligible patients in accordance with CDC guidelines; EHR modification that flagged patients needing HCV testing; Posting of CDC-produced posters in clinic waiting rooms to inform patients about hepatitis C screening for baby boomers; Provision of cards at check-in to remind baby boomers to ask their provider about HCV testing. | promote linkage to medical care and curative therapy when indicated; Enhanced HCV treatment capacity among PCPs; and Educational interventions for providers including online CE, presentations by specialists, teleconferences, and shadowing opportunities; medical and financial navigation services; and public awareness campaign on HCV and promoting screening | antibody tests <ul style="list-style-type: none"> <li>• Proportion of individuals with positive HCV RNA tests</li> <li>• Proportion of individuals with treatment initiation</li> <li>• Proportion of individuals with treatment completion</li> <li>• Proportion of individuals achieving SVR</li> </ul> |
| <b>Sherbuk et al., 2019<sup>57</sup></b> | Virginia, U.S. | Interventional | University ID HCV clinic; Individuals aged ≥18 referred to                                                                                                                                                                                                                     | 824 | N/A                                                                                                                                                                                                                                                                                                                                      | Nurse coordinator scheduled appointments, rescheduled missed                                                                                                                                                                                                                                                                                                          | <ul style="list-style-type: none"> <li>• Proportion of individuals linked to</li> </ul>                                                                                                                                                                                                                   |

|  |  |  |                |  |  |                                                                                                                                                                                                                                                                                                                                                                                                                                           |                                                                                                                                                                                                                                                    |
|--|--|--|----------------|--|--|-------------------------------------------------------------------------------------------------------------------------------------------------------------------------------------------------------------------------------------------------------------------------------------------------------------------------------------------------------------------------------------------------------------------------------------------|----------------------------------------------------------------------------------------------------------------------------------------------------------------------------------------------------------------------------------------------------|
|  |  |  | the HCV clinic |  |  | <p>appointments, attempted multiple contacts by phone when needed, provided face-to-face and telephone-based education and counseling, ensured required paperwork was completed for medication approval, completed required financial screening, prior authorization and patient assistance program paperwork. A pharmacy-based team assisted with prior authorizations and provided telephone counseling related to HCV medications.</p> | <p>first appointment</p> <ul style="list-style-type: none"> <li>• Proportion of individuals with treatment initiation</li> <li>• Proportion of individuals with treatment completion</li> <li>• Proportion of individuals achieving SVR</li> </ul> |
|--|--|--|----------------|--|--|-------------------------------------------------------------------------------------------------------------------------------------------------------------------------------------------------------------------------------------------------------------------------------------------------------------------------------------------------------------------------------------------------------------------------------------------|----------------------------------------------------------------------------------------------------------------------------------------------------------------------------------------------------------------------------------------------------|

|                                            |                    |                |                                                           |       |                                                                                                                                      |                                                                                                                                                                                                                                                                                                                                                                                              |                                                                                                                                                                                                                                                                                                                                                                    |
|--------------------------------------------|--------------------|----------------|-----------------------------------------------------------|-------|--------------------------------------------------------------------------------------------------------------------------------------|----------------------------------------------------------------------------------------------------------------------------------------------------------------------------------------------------------------------------------------------------------------------------------------------------------------------------------------------------------------------------------------------|--------------------------------------------------------------------------------------------------------------------------------------------------------------------------------------------------------------------------------------------------------------------------------------------------------------------------------------------------------------------|
| <b>Simoncini et al., 2019<sup>58</sup></b> | Pennsylvania, U.S. | Interventional | University trauma surgery center; Trauma surgery patients | 1,470 | Patients were screened for HCV antibody as part of the initial trauma laboratory order set and the tests were automatically ordered. | A nurse navigator contacted patients about returning for confirmatory testing if they were discharged prior to the testing and contacted them to discuss results; patients were educated about HCV; a nurse navigator linked or re-engaged those with chronic HCV in care. The navigator made three attempts to reach the patient by phone and if unsuccessful, a certified letter was sent. | <ul style="list-style-type: none"> <li>• Proportion of individuals screened for HCV</li> <li>• Proportion of individuals with positive HCV antibody tests</li> <li>• Proportion of individuals with positive HCV RNA tests</li> <li>• Proportion of individuals successfully contacted</li> <li>• Proportion of individuals linked to first appointment</li> </ul> |
|--------------------------------------------|--------------------|----------------|-----------------------------------------------------------|-------|--------------------------------------------------------------------------------------------------------------------------------------|----------------------------------------------------------------------------------------------------------------------------------------------------------------------------------------------------------------------------------------------------------------------------------------------------------------------------------------------------------------------------------------------|--------------------------------------------------------------------------------------------------------------------------------------------------------------------------------------------------------------------------------------------------------------------------------------------------------------------------------------------------------------------|

|                                          |                      |                               |                                                                                                                                                                                           |         |                                                                                                                                                                                                                           |                                                                                                                                      |                                                                                                                                                                                                                                                  |
|------------------------------------------|----------------------|-------------------------------|-------------------------------------------------------------------------------------------------------------------------------------------------------------------------------------------|---------|---------------------------------------------------------------------------------------------------------------------------------------------------------------------------------------------------------------------------|--------------------------------------------------------------------------------------------------------------------------------------|--------------------------------------------------------------------------------------------------------------------------------------------------------------------------------------------------------------------------------------------------|
|                                          |                      |                               |                                                                                                                                                                                           |         |                                                                                                                                                                                                                           |                                                                                                                                      | <ul style="list-style-type: none"> <li>• Proportion of individuals with treatment initiation</li> </ul>                                                                                                                                          |
| <b>Tapp et al., 2020<sup>59</sup></b>    | North Carolina, U.S. | Observational (retrospective) | 12 practices, including 5 in a non-profit, vertically integrated healthcare system; Baby boomers attending outpatient visit with no previous HCV diagnosis or positive HCV antibody test. | 120,054 | EHR alert for HCV screening test requiring an order for an HCV test and results to be entered to be deactivated. Educational program for providers on HCV, HCV screening recommendations, linkage to care, and the alert. | Linkage to care for this study is defined as the completion of a first medical visit after diagnosis into primary or specialty care. | <ul style="list-style-type: none"> <li>• Proportion of individuals with positive HCV antibody tests</li> <li>• Proportion of individuals with positive HCV RNA tests</li> <li>• Proportion of individuals linked to first appointment</li> </ul> |
| <b>Traeger et al., 2020<sup>60</sup></b> | Victoria, Australia  | Observational (retrospective) | 18 services participating in national sentinel surveillance                                                                                                                               | 113,832 | N/A                                                                                                                                                                                                                       | N/A                                                                                                                                  | <ul style="list-style-type: none"> <li>• Proportion of individuals</li> </ul>                                                                                                                                                                    |

|  |  |  |                               |  |  |  |                                                                                                                                                                                                                                                                                                                                                                                                                                                                 |
|--|--|--|-------------------------------|--|--|--|-----------------------------------------------------------------------------------------------------------------------------------------------------------------------------------------------------------------------------------------------------------------------------------------------------------------------------------------------------------------------------------------------------------------------------------------------------------------|
|  |  |  | system <sup>a</sup> ;<br>PWID |  |  |  | tested for<br>HCV<br><ul style="list-style-type: none"><li>• Proportion<br/>of<br/>individuals<br/>with positive<br/>HCV<br/>antibody<br/>tests</li><li>• Proportion<br/>of<br/>individuals<br/>with positive<br/>HCV RNA<br/>tests</li><li>• Proportion<br/>of<br/>individuals<br/>linked to<br/>first<br/>appointment</li><li>• Proportion<br/>of<br/>individuals<br/>with<br/>treatment<br/>initiation</li><li>• Proportion<br/>of<br/>individuals</li></ul> |
|--|--|--|-------------------------------|--|--|--|-----------------------------------------------------------------------------------------------------------------------------------------------------------------------------------------------------------------------------------------------------------------------------------------------------------------------------------------------------------------------------------------------------------------------------------------------------------------|



|                                         |             |                |                                                                                                                                                                                                                                                           |        |                                                                                                                                                                                                                                                                                    |                                                                                                                                                                                                                                                                                                                                                                                                  | achieving SVR                                                                                                                                                                                                                                                                                                                             |
|-----------------------------------------|-------------|----------------|-----------------------------------------------------------------------------------------------------------------------------------------------------------------------------------------------------------------------------------------------------------|--------|------------------------------------------------------------------------------------------------------------------------------------------------------------------------------------------------------------------------------------------------------------------------------------|--------------------------------------------------------------------------------------------------------------------------------------------------------------------------------------------------------------------------------------------------------------------------------------------------------------------------------------------------------------------------------------------------|-------------------------------------------------------------------------------------------------------------------------------------------------------------------------------------------------------------------------------------------------------------------------------------------------------------------------------------------|
| <b>Turner et al., 2019<sup>61</sup></b> | Texas, U.S. | Interventional | 5 federally qualified health centers in Veterans Health Administration (VHA) and 1 family medicine residency program serving low-income communities in diverse locations with largely Hispanic population; Baby boomers who had never been tested for HCV | 27,700 | Either an electronic BPA or trained clinic staff reviewed medical records and identified individuals eligible for HCV antibody testing and then appended the order and diagnosis code for clinician approval. Posters and fliers in clinic about HCV screening and opt-out option. | Care navigator supported individuals in applying for Medicaid and if denied in applying to a pharmaceutical company prescription assistance program and facilitated DAA receipt and adherence to treatment, office visits and testing. Staff used an interactive mobile application on HCV that addressed concerns of those newly diagnosed. PCP received training on HCV and DAA management and | <ul style="list-style-type: none"> <li>• Proportion of individuals screened for HCV</li> <li>• Proportion of individuals with positive HCV antibody tests</li> <li>• Proportion of individuals with positive HCV RNA tests</li> <li>• Proportion of individuals with treatment initiation</li> <li>• Proportion of individuals</li> </ul> |

|                                        |                  |                               |                                                                                                                 |        |                                                                                                                                                                                                                                                                                         |                                                                                                                                                                                                                                                                                                                              |                                                                                                                                                                                                                                                                                      |
|----------------------------------------|------------------|-------------------------------|-----------------------------------------------------------------------------------------------------------------|--------|-----------------------------------------------------------------------------------------------------------------------------------------------------------------------------------------------------------------------------------------------------------------------------------------|------------------------------------------------------------------------------------------------------------------------------------------------------------------------------------------------------------------------------------------------------------------------------------------------------------------------------|--------------------------------------------------------------------------------------------------------------------------------------------------------------------------------------------------------------------------------------------------------------------------------------|
|                                        |                  |                               |                                                                                                                 |        |                                                                                                                                                                                                                                                                                         | treatment. PCP could access weekly specialist teleconsultation hour for reviewing uninsured patients. Study paid for labs and imaging tests.                                                                                                                                                                                 | with treatment completion <ul style="list-style-type: none"> <li>• Proportion of individuals achieving SVR</li> </ul>                                                                                                                                                                |
| <b>White et al., 2016<sup>62</sup></b> | California, U.S. | Observational (retrospective) | Single-center urban ED; Baby boomers or those reporting history of injection drug use and not known to have HCV | 26,639 | Opt-out screening integrated into ED triage process with prompts in the EHR and conducted by a trained triage nurse who completed a series of screening questions and offered screening for HIV, HCV or both depending on the responses. For individuals who consented to screening the | Program coordinator contacted those not informed before discharge and made arrangements for confirmatory testing in primary care and linkage to care at the centers HCV clinic, or ED clerk made HCV clinic appointment for HCV positive individuals. For those not contacted, an automatic flag was placed in the ED's EHR. | <ul style="list-style-type: none"> <li>• Proportion of individuals screened for HCV</li> <li>• Proportion of individuals with positive HCV antibody tests</li> <li>• Proportion of individuals with positive HCV RNA tests</li> <li>• Proportion of individuals linked to</li> </ul> |

|                                              |                                          |                       |                                                                                                                                                                                   |            |                                                                                                                                                                                                            |                                                                                                                                                                                                                                                                      |                          |
|----------------------------------------------|------------------------------------------|-----------------------|-----------------------------------------------------------------------------------------------------------------------------------------------------------------------------------|------------|------------------------------------------------------------------------------------------------------------------------------------------------------------------------------------------------------------|----------------------------------------------------------------------------------------------------------------------------------------------------------------------------------------------------------------------------------------------------------------------|--------------------------|
|                                              |                                          |                       |                                                                                                                                                                                   |            | <p>triage nurse electronically ordered the test. Physician trained in the process could see the order in the HER and then could order HCV test as part of a hepatitis panel or as a rapid HCV AB test.</p> |                                                                                                                                                                                                                                                                      | <p>first appointment</p> |
| <p><b>Yang et al., 2021<sup>63</sup></b></p> | <p>Chapel Hill, North Carolina, U.S.</p> | <p>Interventional</p> | <p>Academic, pharmacy-based collaborative, gastroenterology clinic; Individuals aged <math>\geq 18</math> receiving HCV treatment who had treatment barriers or who missed an</p> | <p>116</p> | <p>N/A</p>                                                                                                                                                                                                 | <p>Primarily phone calls supported by electronic medical record system messaging and e-mails from a nurse care coordinator (NCC). The primary nurse interventions (defined by the initial reason the patient was referred to the NCC) included resolving missing</p> |                          |

|                                           |      |                |                                                                                                           |       |                                                                                                                                                                           |                                                                                                                                                                                                                                                       |                                                                                                                                                                   |
|-------------------------------------------|------|----------------|-----------------------------------------------------------------------------------------------------------|-------|---------------------------------------------------------------------------------------------------------------------------------------------------------------------------|-------------------------------------------------------------------------------------------------------------------------------------------------------------------------------------------------------------------------------------------------------|-------------------------------------------------------------------------------------------------------------------------------------------------------------------|
|                                           |      |                | appointment that was not rescheduled indicating they had been lost to follow up.                          |       |                                                                                                                                                                           | labs, missed appointments, HCC surveillance, transportation coordination, and financial assistance. Supplemental interventions included transportation coordination, financial assistance, labs scheduled, or HCC surveillance appointment scheduled. |                                                                                                                                                                   |
| <b>Younossi et al., 2016<sup>64</sup></b> | U.S. | Interventional | 5 gastroenterology centers; Individuals who were baby boomers with no documented history of HCV screening | 2,000 | Universal screening was implemented for all eligible individuals who completed the consent process. Sites conducted HCV Ab rapid testing using blood samples. Ab-positive | HCV RNA positive individuals were counseled and educated on HCV and an appointment within the site practice or the geographical area was established. The appointment was recorded, but attendance was                                                | <ul style="list-style-type: none"> <li>• Proportion of individuals with positive HCV antibody tests</li> <li>• Proportion of individuals with positive</li> </ul> |

|                                            |                            |                             |                                                                                                                 |     |                                                                                     |                           |                                                                                                                                                                                                                                                                                            |
|--------------------------------------------|----------------------------|-----------------------------|-----------------------------------------------------------------------------------------------------------------|-----|-------------------------------------------------------------------------------------|---------------------------|--------------------------------------------------------------------------------------------------------------------------------------------------------------------------------------------------------------------------------------------------------------------------------------------|
|                                            |                            |                             |                                                                                                                 |     | individuals who consented had confirmatory test ordered and results were collected. | not confirmed or tracked. | HCV RNA tests                                                                                                                                                                                                                                                                              |
| <b>Zuckerman et al., 2018<sup>65</sup></b> | Nashville, Tennessee, U.S. | Observational (prospective) | Infectious disease clinic at a university medical center; Individuals with chronic HCV newly referred to clinic | 187 | N/A                                                                                 | N/A                       | <ul style="list-style-type: none"> <li>• Proportion of individuals linked to first appointment</li> <li>• Proportion of individuals with treatment initiation</li> <li>• Proportion of individuals with treatment completion</li> <li>• Proportion of individuals achieving SVR</li> </ul> |

*Abbreviations:* AB = antibody; BPA = Best practice alert; baby boomers = individuals born between 1946 and 1964; CDC = Centers for Disease Control and Prevention; CDS = Clinical decision support; CNS = Clinical nurse specialist; DAA = direct acting antivirals; ED = emergency department; EHR = electronic health records; FQHCs = Federally Qualified Health Centers; GPs = General practitioners; HCC = hepatocellular carcinoma; HCV = hepatitis C virus; HE = health educator; HH = Highland Hospital; HIV = human immunodeficiency virus; HRQL = health related quality of life; ID = infectious disease; LTCC = Linkage to care coordinator; MDT = Multidisciplinary team (comprising viral hepatology consultants, pharmacists and nurses); N/A = Not applicable; PCP = Primary care provider; PN = Patient navigator; PWID = people who inject drugs; RCT = Randomized controlled trial; SUD = substance use disorder; SVR = sustained virologic response; UAB = University of Alabama at Birmingham; UCLA = University of California, Los Angeles; UK = United Kingdom; U.S. = United States of America; U.S. VHA = United States Veterans Health Administration; VA = Veteran Affairs; VAHCS = Veteran Affairs Health Care System.

<sup>a</sup> Australian Collaboration for Coordinated Enhanced Sentinel Surveillance of Bloodborne Viruses and Sexually Transmitted Infections (ACCESS) sentinel surveillance system

*Definitions of outcomes:*

Proportion of individuals screened for HCV = # of individuals with HCV testing / # of eligible individuals for HCV screening

Proportion of individuals with positive HCV antibody tests = # of individuals with positive antibody test / # of individuals screened

Proportion of individuals with positive HCV RNA tests = # of individuals with positive HCV RNA results / # individuals with positive HCV antibody tests

Proportion of individuals successfully contacted = # individuals contacted / # individuals with positive HCV RNA tests

Proportion of individuals linked to first appointment = # of individuals attending first appointment at HCV clinic / # of individuals with positive HCV RNA tests

Proportion of individuals with treatment initiation = # of individuals who initiated DAA treatment / # of individuals with positive HCV RNA tests

Proportion of individuals with treatment completion = # of individuals who completed DAA treatment / # of individuals with positive HCV RNA tests

Proportion of individuals achieving SVR = # of individuals with confirmed SVR / of individuals with positive HCV RNA tests

A.

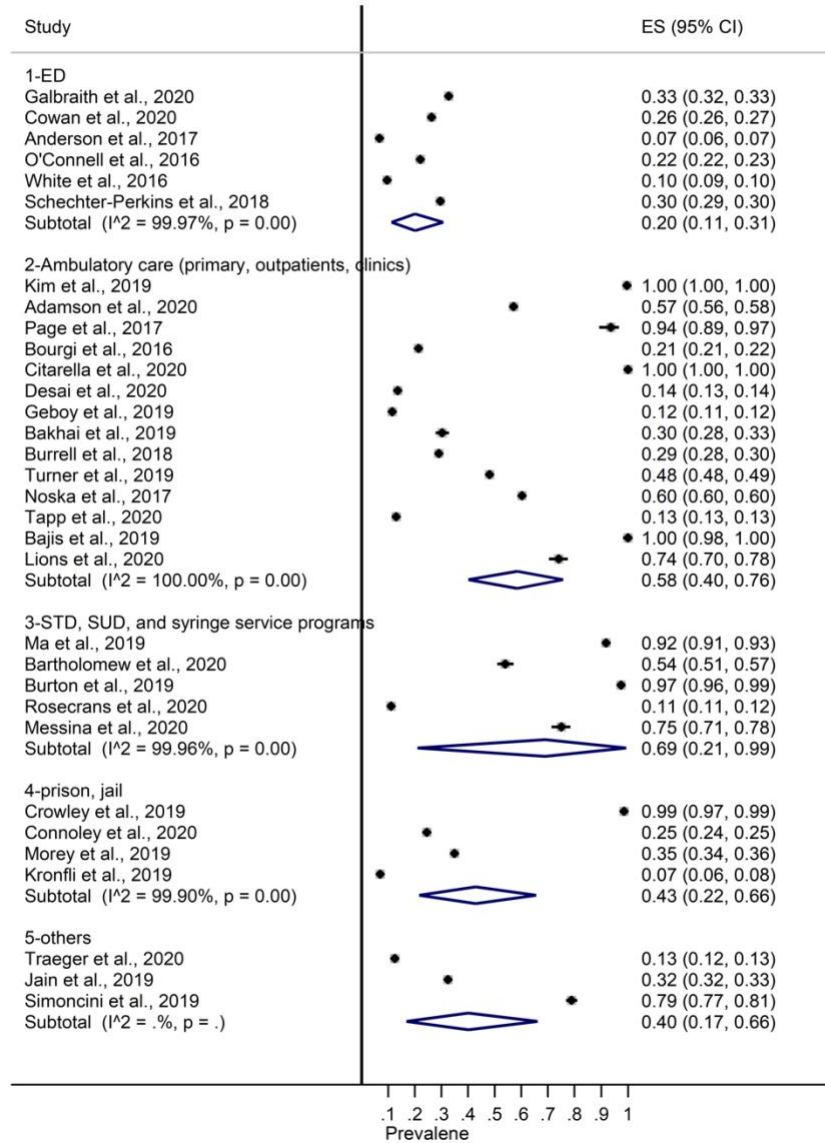

B.

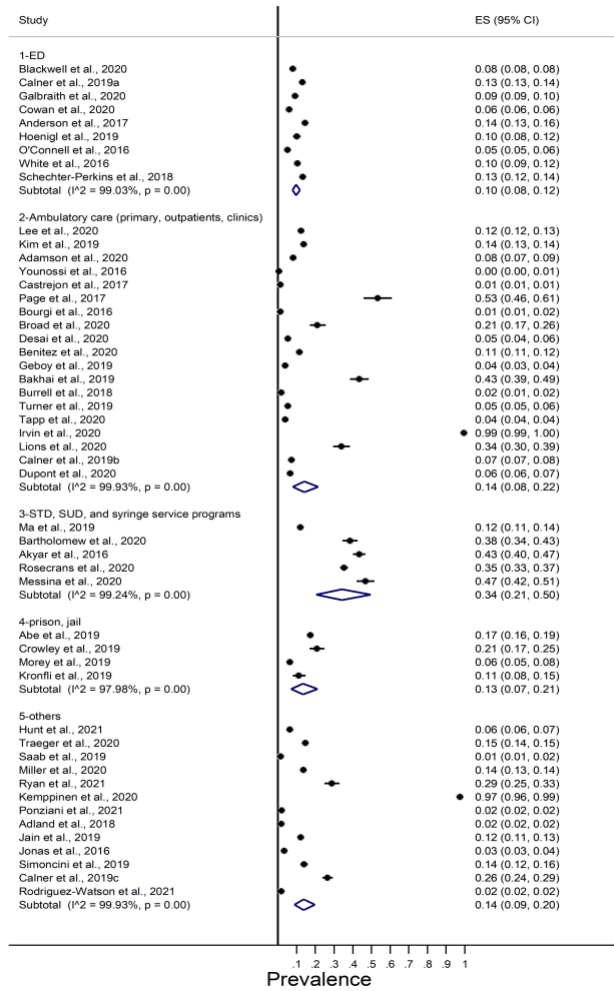



C.

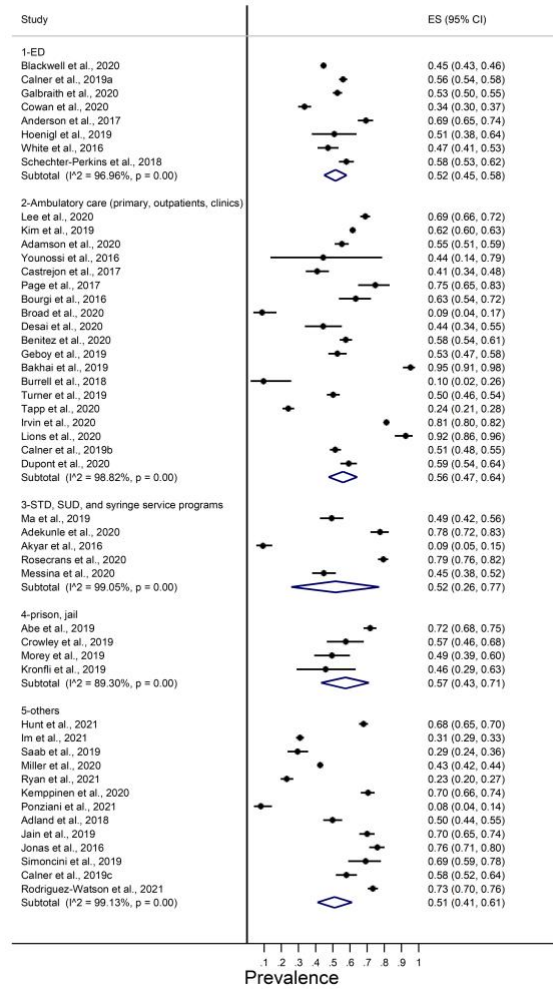

D.

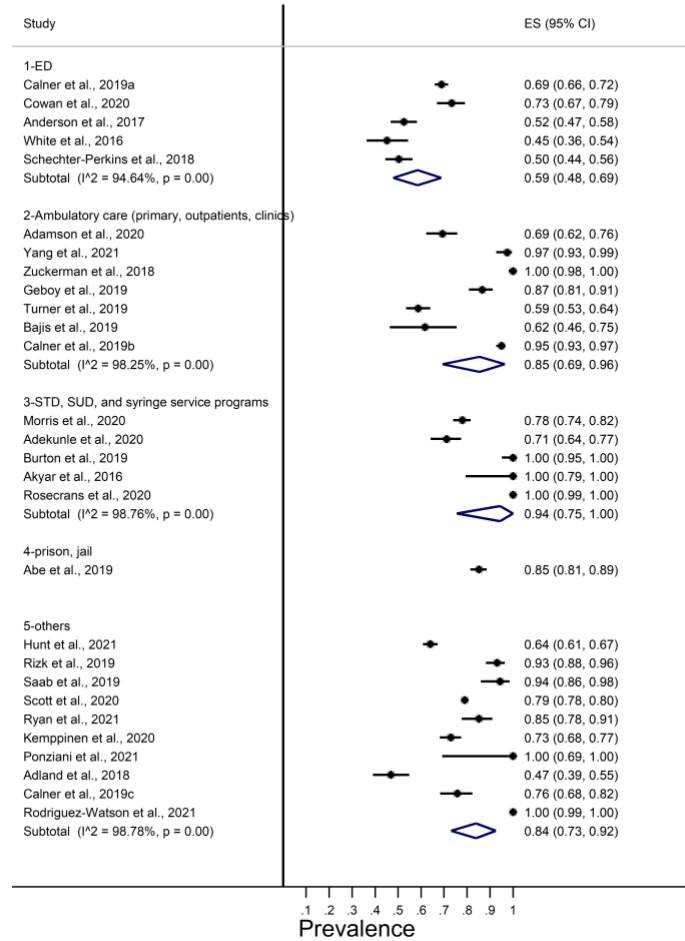

E.

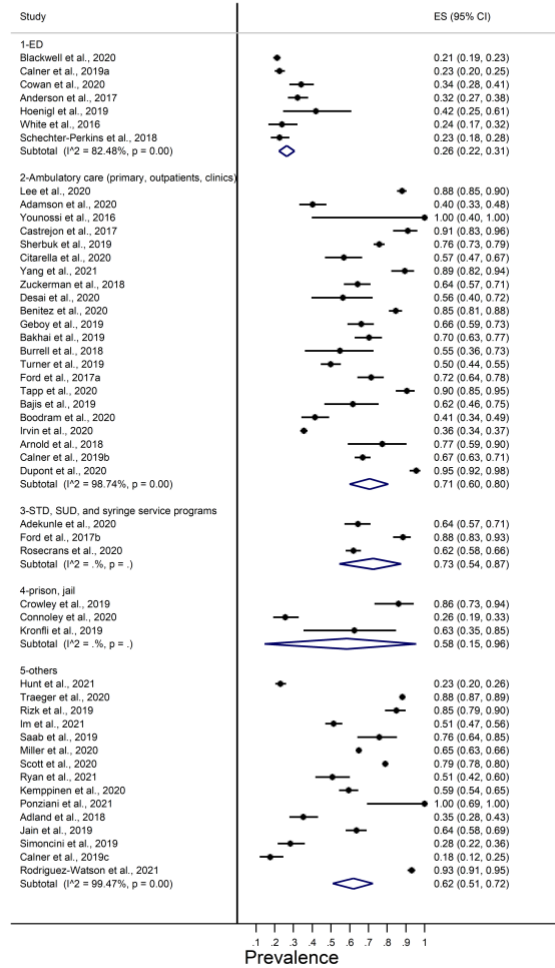

F.

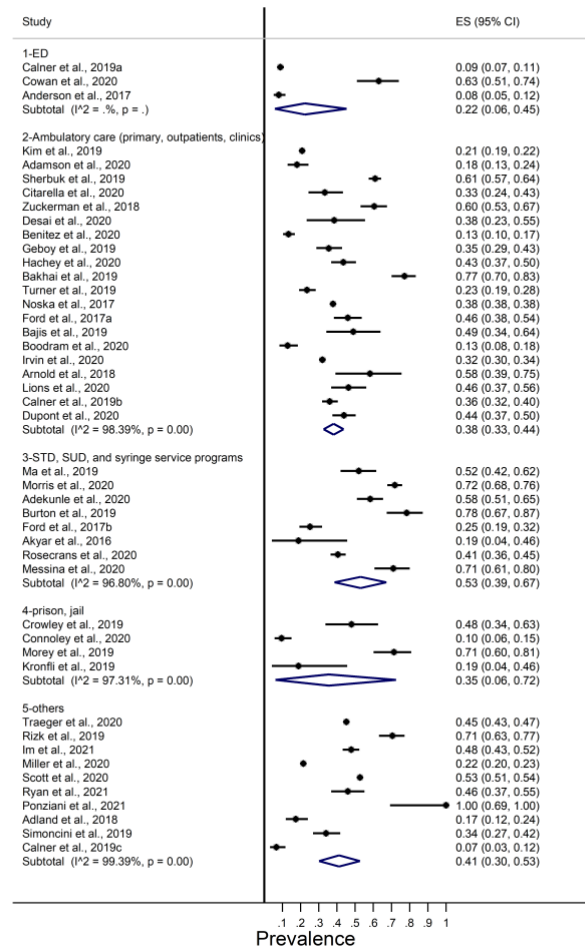

G.

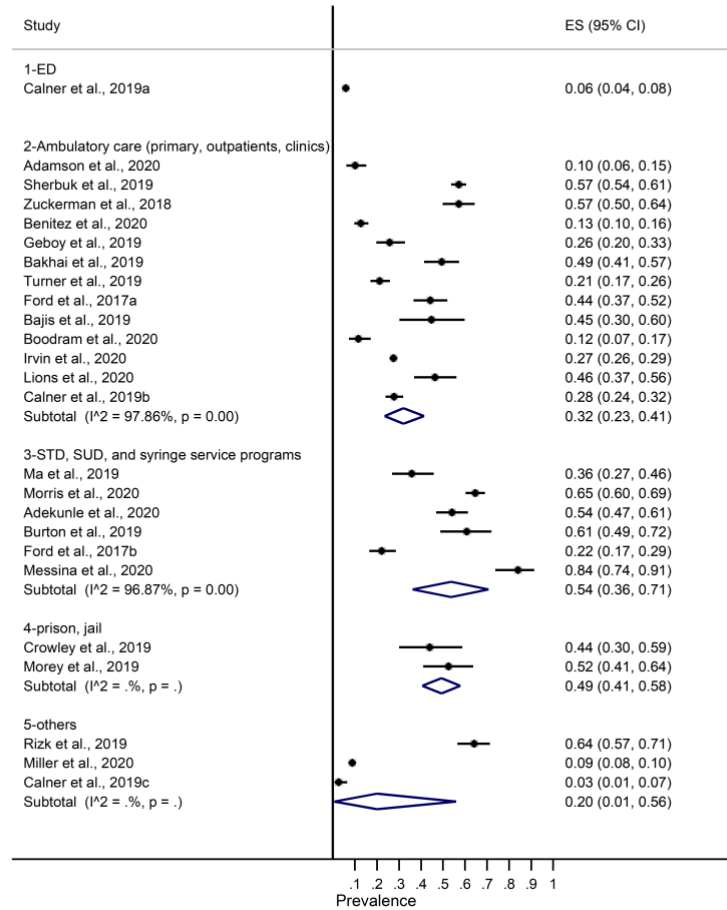

H.

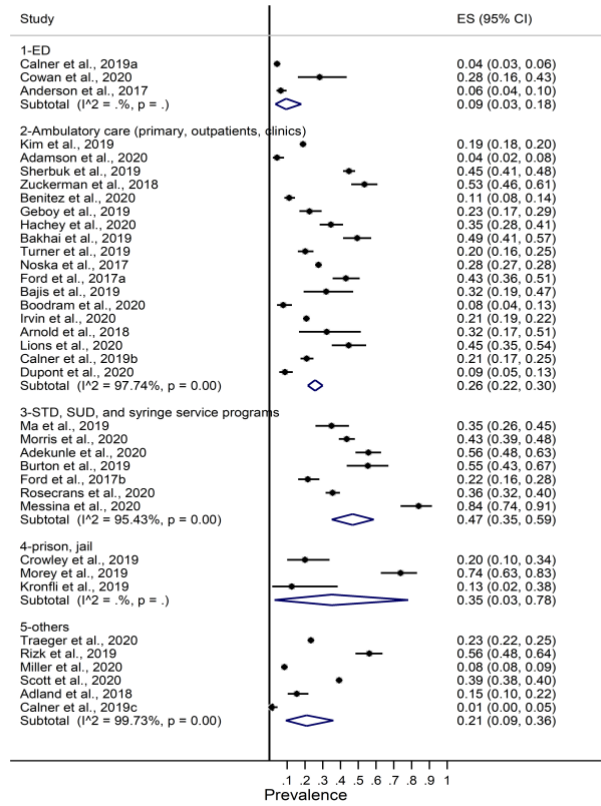

Appendix Figure 1, A-H. Outcomes rates at each step of the HCV cascade of care (Steps 1-8), stratified by healthcare setting

A.

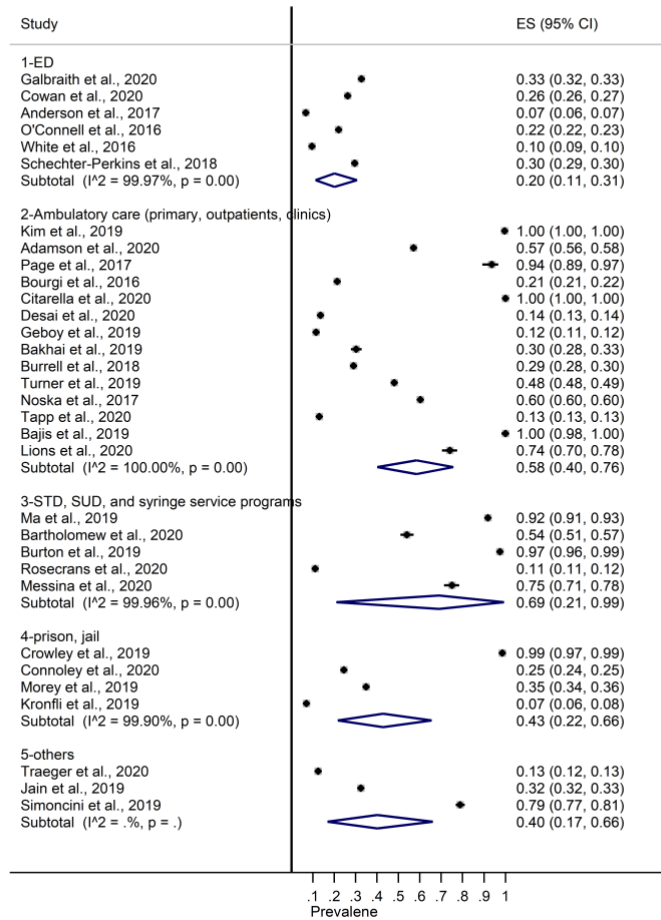

B.

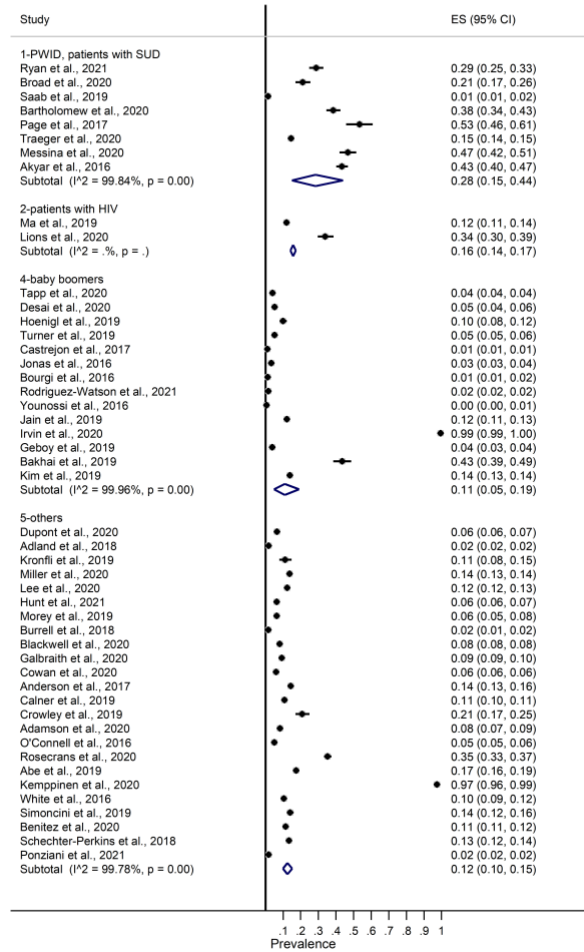



C.

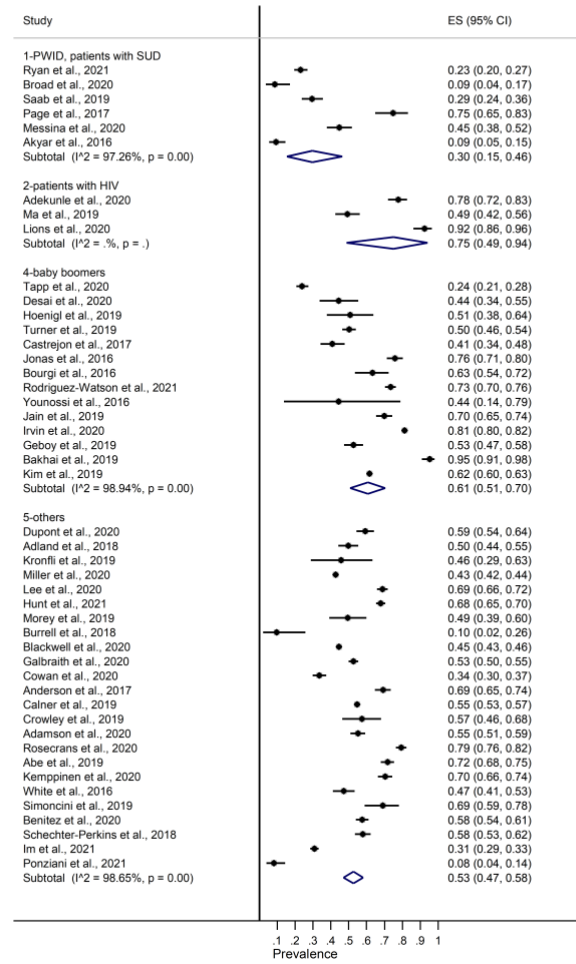

D.

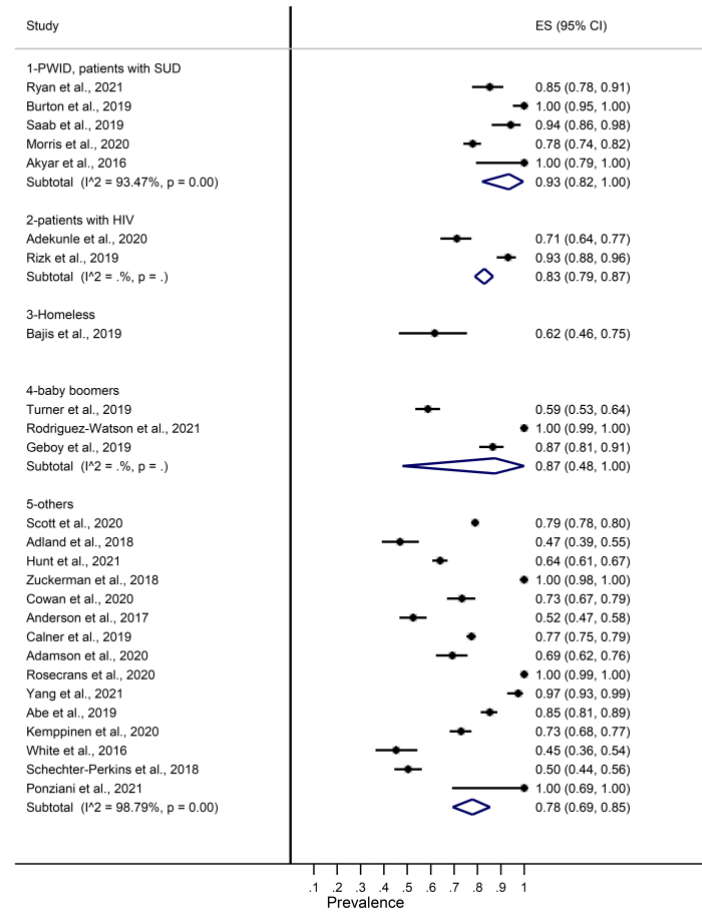

E.

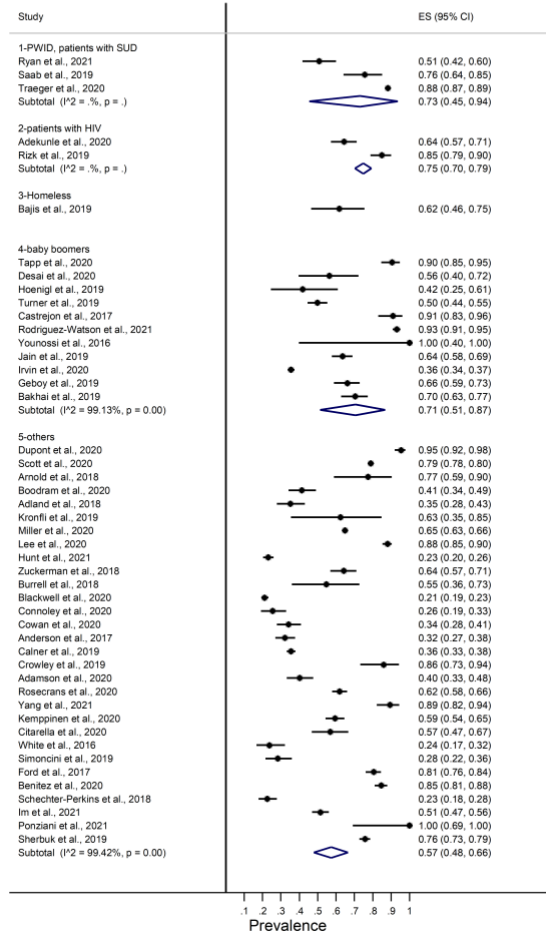

F.

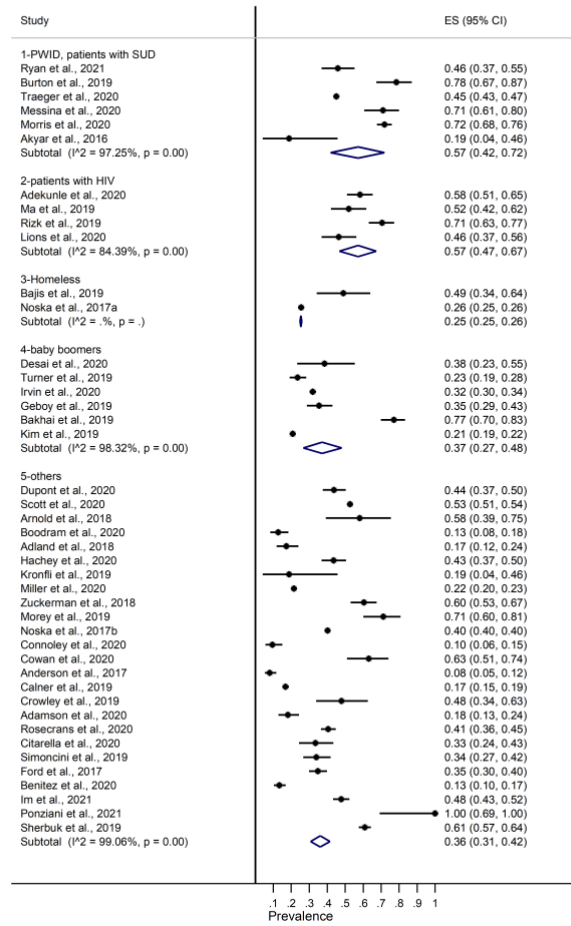

G.

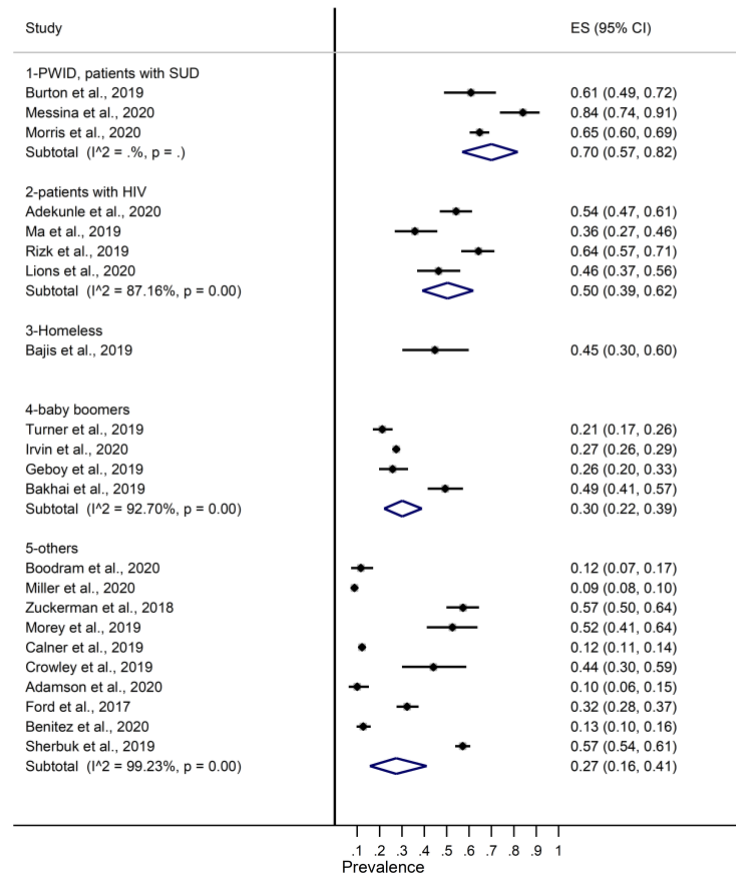

H.

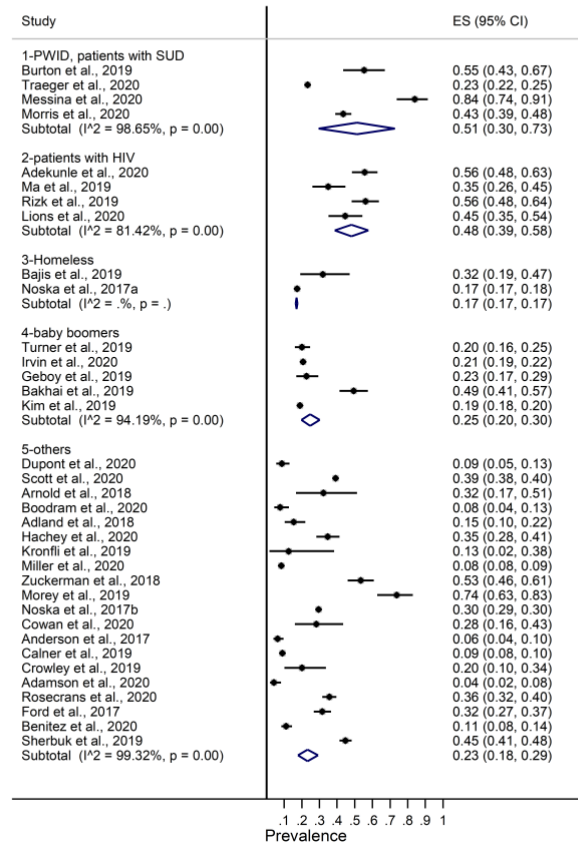

Appendix Figure 2, A-H. Outcomes rates at each step of the HCV cascade of care (Steps 1-8), stratified by key populations.

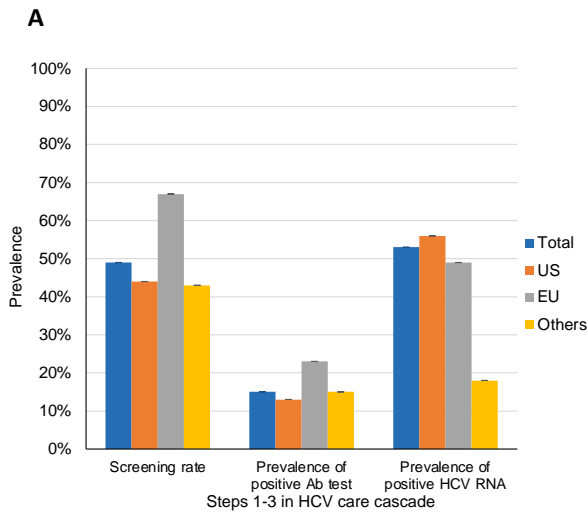

|                               | Step 1                      | Step 2                      | Step 3                      |
|-------------------------------|-----------------------------|-----------------------------|-----------------------------|
|                               | # of studies (participants) | # of studies (participants) | # of studies (participants) |
| Total                         | 32 (6,396,187)              | 48 (508,412)                | 47 (42,163)                 |
| US                            | 22 (6,215,745)              | 36 (449,212)                | 37 (40,037)                 |
| EU                            | 7 (61,477)                  | 9 (44,240)                  | 8 (2,011)                   |
| Others (Australia and Canada) | 3 (118,965)                 | 3 (14,960)                  | 2 (115)                     |

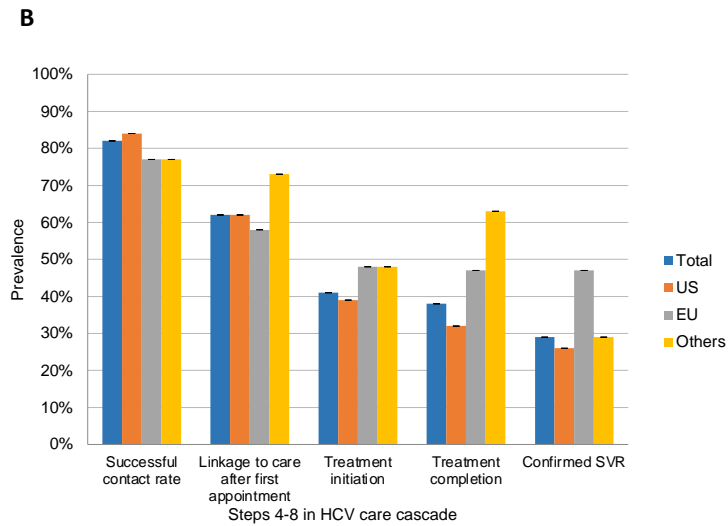

|                               | Step 4                      | Step 5                      | Step 6                      | Step 7                      | Step 8                      |
|-------------------------------|-----------------------------|-----------------------------|-----------------------------|-----------------------------|-----------------------------|
|                               | # of studies (participants) |
| Total                         | 26 (16,069)                 | 47 (31,842)                 | 42 (205,163)                | 22 (12,762)                 | 34 (204,015)                |
| US                            | 5 (758)                     | 37 (27,082)                 | 29 (200,014)                | 16 (11,924)                 | 25 (199,286)                |
| EU                            | 2 (367)                     | 7 (984)                     | 9 (897)                     | 4 (315)                     | 5 (477)                     |
| Others (Australia and Canada) | 1 (47)                      | 3 (3,776)                   | 4 (4,252)                   | 2 (523)                     | 4 (4,252)                   |

**Appendix Figure 3: HCV treatment cascade by country (A) Steps 1–3 and (B) Steps 4–8**

(A) Steps 1–3. Among individuals who were eligible for HCV screening, we calculated the proportion of individuals who were screened (Step 1). Among screened individuals, we calculated the proportion of individuals with positive antibody (Ab) test results (Step 2), and among individuals with positive Ab test results, we calculated the proportion of individuals with positive HCV RNA test results (Step 3). (B) Steps 4–8. Using the pooled estimates of the eight steps and the numbers of participants from Steps 1–3, we calculated the proportion of HCV-infected individuals completing each HCV cascade step by dividing the number of individuals who completed each step (Steps 4–8) by the number of individuals with positive HCV RNA test results.

Abbreviations: EU, Europe; U.S., United States; SVR, sustained virologic response.

## References for this document

1. Abe CM, Aguwa M, Zhao M, Sullivan J, Porsa E, Nijhawan AE. Hepatitis C virus infection in the Dallas County Jail: implications for screening, prevention, and linkage to care. *Public Health Reports* 2019; **134**(6): 626-33.
2. Adamson PC, Canterino J. A Co-localized Hepatitis C Virus Clinic in a Primary Care Practice Improves Linkage to Care in a High Prevalence Population Running Title: Improving Linkage to Care for Hepatitis C.
3. Adekunle RO, DeSilva K, Cartwright EJ. Hepatitis C care continuum in a human immunodeficiency virus (HIV) positive cohort: data from the HIV Atlanta Veterans Affairs cohort study. *Open forum infectious diseases*; 2020: Oxford University Press US; 2020. p. ofaa085.
4. Adland E, Jesuthasan G, Downs L, et al. Hepatitis virus (HCV) diagnosis and access to treatment in a UK cohort. *BMC Infectious Diseases* 2018; **18**(1): 1-10.
5. Akyar E, Seneca KH, Akyar S, Schofield N, Schwartz MP, Nahass RG. Linkage to care for suburban heroin users with hepatitis C virus infection, New Jersey, USA. *Emerging infectious diseases* 2016; **22**(5): 907.
6. Anderson ES, Galbraith JW, Deering LJ, et al. Continuum of care for hepatitis C virus among patients diagnosed in the emergency department setting. *Clinical Infectious Diseases* 2017; **64**(11): 1540-6.
7. Arnold RM, Machover H, Wall ME, Ahmadizadeh I, Potts W, Himelhoch S. "Why me?" Understanding the HCV care continuum among people with serious mental illness. *Psychiatric Services* 2018; **69**(11): 1188-90.
8. Bajis S, Grebely J, Cooper L, et al. Hepatitis C virus testing, liver disease assessment and direct-acting antiviral treatment uptake and outcomes in a service for people who are homeless in Sydney, Australia: the LiveRLife homelessness study. *Journal of viral hepatitis* 2019; **26**(8): 969-79.
9. Bakhai S, Nallapeta N, El-Atoum M, Arya T, Reynolds JL. Improving hepatitis C screening and diagnosis in patients born between 1945 and 1965 in a safety-net primary care clinic. *BMJ Open Quality* 2019; **8**(3): e000577.
10. Bartholomew TS, Tookes HE, Serota DP, Behrends CN, Forrest DW, Feaster DJ. Impact of routine opt-out HIV/HCV screening on testing uptake at a syringe services program: an interrupted time series analysis. *International Journal of Drug Policy* 2020; **84**: 102875.
11. Benitez TM, Fernando SM, Amini C, Saab S. Geographically focused collocated Hepatitis C screening and treatment in Los Angeles's Skid Row. *Digestive Diseases and Sciences* 2020; **65**(10): 3023-31.
12. Blackwell JA, Rodgers JB, Franco RA, et al. Predictors of linkage to care for a nontargeted emergency department hepatitis C screening program. *The American journal of emergency medicine* 2020; **38**(7): 1396-401.



13. Boodram B, Kaufmann M, Aronsohn A, et al. Case Management and capacity building to enhance hepatitis C treatment uptake at community health centers in a large urban setting. *Family & Community Health* 2020; **43**(2): 150-60.
14. Bourgi K, Brar I, Baker-Genaw K. Health disparities in hepatitis C screening and linkage to care at an integrated health system in southeast Michigan. *PLoS One* 2016; **11**(8): e0161241.
15. Broad J, Mason K, Guyton M, Lettner B, Matelski J, Powis J. Peer outreach point-of-care testing as a bridge to hepatitis C care for people who inject drugs in Toronto, Canada. *International Journal of Drug Policy* 2020; **80**: 102755.
16. Burrell CN, Sharon MJ, Davis SM, Wojcik EM, Martin IB. Implementation of a collaborative HIV and hepatitis C screening program in Appalachian urgent care settings. *Western Journal of Emergency Medicine* 2018; **19**(6): 1057.
17. Burton MJ, Voluse AC, Anthony V. Integrating comprehensive hepatitis C virus care within a residential substance use disorder treatment program. *Journal of Substance Abuse Treatment* 2019; **98**: 9-14.
18. Calner P, Sperring H, Ruiz-Mercado G, et al. HCV screening, linkage to care, and treatment patterns at different sites across one academic medical center. *PLoS One* 2019; **14**(7): e0218388.
19. Castrejón M, Chew KW, Javanbakht M, Humphries R, Saab S, Klausner JD. Implementation of a large system-wide hepatitis C virus screening and linkage to care program for baby boomers. *Open forum infectious diseases*; 2017: Oxford University Press; 2017.
20. Citarella A, Cammarota S, Bernardi FF, et al. Screening, Linkage to Care and Treatment of Hepatitis C Infection in Primary Care Setting in the South of Italy. *Life* 2020; **10**(12): 359.
21. Connoley D, Francis-Graham S, Storer M, et al. Detection, stratification and treatment of hepatitis C–positive prisoners in the United Kingdom prison estate: Development of a pathway of care to facilitate the elimination of hepatitis C in a London prison. *Journal of Viral Hepatitis* 2020; **27**(10): 987-95.
22. Cowan EA, Dinani A, Brandspiegel S, et al. Nontargeted hepatitis C screening in an urban emergency department in New York City. *The Journal of Emergency Medicine* 2021; **60**(3): 299-309.
23. Crowley D, Murtagh R, Cullen W, et al. Evaluating peer-supported screening as a hepatitis C case-finding model in prisoners. *Harm Reduction Journal* 2019; **16**(1): 1-10.
24. Desai N, Rich NE, Jain MK, et al. Randomized clinical trial of inreach with or without mailed outreach to promote hepatitis C screening in a difficult-to-reach patient population. *Official journal of the American College of Gastroenterology| ACG* 2021; **116**(5): 976-83.
25. Dupont SC, Fluker S-A, Quairoli KM, et al. Improved Hepatitis C Cure Cascade Outcomes Among Urban Baby Boomers in the Direct-Acting Antiviral Era. *Public Health Reports* 2020; **135**(1): 107-13.
26. Ford MM, Johnson N, Desai P, Rude E, Laraque F. From care to cure: demonstrating a model of clinical patient navigation for hepatitis C care and treatment in high-need patients. *Clinical Infectious Diseases* 2017; **64**(5): 685-91.

27. Galbraith JW, Anderson ES, Hsieh Y-H, et al. High prevalence of hepatitis C infection among adult patients at four urban emergency departments—Birmingham, Oakland, Baltimore, and Boston, 2015–2017. *Morbidity and Mortality Weekly Report* 2020; **69**(19): 569.
28. Geboy AG, Nichols WL, Fernandez SJ, Desale S, Basch P, Fishbein DA. Leveraging the electronic health record to eliminate hepatitis C: Screening in a large integrated healthcare system. *PLoS One* 2019; **14**(5): e0216459.
29. Hachey DM, Holmes JT, Aubuchon-Endsley NL. Hepatitis C treatment cascade in a federally qualified health center. *Journal of Community Health* 2020; **45**(2): 264-8.
30. Hoenigl M, Mathur K, Blumenthal J, et al. Universal HIV and birth cohort HCV screening in San Diego emergency departments. *Scientific reports* 2019; **9**(1): 1-7.
31. Hunt BR, Ahmed C, Ramirez-Mercado K, Patron C, Glick NR. Routine screening and linkage to care for hepatitis C virus in an urban safety-net health system, 2017-2019. *Public Health Reports* 2021; **136**(2): 219-27.
32. Im DC, Reddy S, Hawkins C, Galvin S. Characteristics and specialist linkage to care of patients diagnosed with chronic hepatitis C across different settings in an urban academic hospital: implications for improving diagnosis and linkage to care. *Frontiers in Microbiology* 2021; **12**: 576357.
33. Irvin R, Ntiri-Reid B, Kleinman M, et al. Sharing the cure: Building primary care and public health infrastructure to improve the hepatitis C care continuum in Maryland. *Journal of viral hepatitis* 2020; **27**(12): 1388-95.
34. Jain MK, Rich NE, Ahn C, et al. Evaluation of a multifaceted intervention to reduce health disparities in hepatitis C screening: a pre-post analysis. *Hepatology* 2019; **70**(1): 40-50.
35. Jonas MC, Rodriguez CV, Redd J, Sloane DA, Winston BJ, Loftus BC. Streamlining screening to treatment: the hepatitis C cascade of care at Kaiser Permanente Mid-Atlantic States. *Clinical Infectious Diseases* 2016; **62**(10): 1290-6.
36. Kemppinen J, Anttila HK, Suomalainen P, Vuoti S. Expanding access to hepatitis C treatment by improving linkage to care: Establishing a cascade of care and active linkage program for the South Karelia region in Finland. *Health Science Reports* 2020; **3**(4).
37. Kim NJ, Locke CJ, Park H, Magee C, Bacchetti P, Khalili M. Race and hepatitis C care continuum in an underserved birth cohort. *Journal of general internal medicine* 2019; **34**(10): 2005-13.
38. Kronfli N, Dussault C, Klein MB, Lebouché B, Sebastiani G, Cox J. The hepatitis C virus cascade of care in a Quebec provincial prison: a retrospective cohort study. *Canadian Medical Association Open Access Journal* 2019; **7**(4): E674-E9.
39. Lee AB, Karumberia S, Gilmore A, et al. Hepatitis C among high-risk Alabamians: disease burden and screening effectiveness. *The Journal of Infectious Diseases* 2020; **222**(Supplement\_5): S365-S75.

40. Lions C, Laroche H, Zaegel-Faucher O, et al. Hepatitis C virus-microelimination program and patient trajectories after hepatitis C virus cure in an outpatient HIV clinical unit. *European Journal of Gastroenterology & Hepatology* 2020; **32**(9): 1212-21.
41. Ma J, Non L, Amornsawadwattana S, Olsen MA, Garavaglia Wilson A, Presti RM. Hepatitis C care cascade in HIV patients at an urban clinic in the early direct-acting antiviral era. *International journal of STD & AIDS* 2019; **30**(9): 834-42.
42. Messina V, Russo A, Parente E, et al. Innovative procedures for micro-elimination of HCV infection in persons who use drugs. *Journal of Viral Hepatitis* 2020; **27**(12): 1437-43.
43. Miller LS, Millman AJ, Lom J, et al. Defining the hepatitis C cure cascade in an urban health system using the electronic health record. *Journal of viral hepatitis* 2020; **27**(1): 13-9.
44. Morey S, Hamoodi A, Jones D, et al. Increased diagnosis and treatment of hepatitis C in prison by universal offer of testing and use of telemedicine. *Journal of Viral Hepatitis* 2019; **26**(1): 101-8.
45. Morris L, Selvey L, Williams O, Gilks C, Kvassy A, Smirnov A. Hepatitis C cascade of care at an integrated community facility for people who inject drugs. *Journal of substance abuse treatment* 2020; **114**: 108025.
46. Noska AJ, Belperio PS, Loomis TP, O'Toole TP, Backus LI. Engagement in the hepatitis C care cascade among homeless veterans, 2015. *Public Health Reports* 2017; **132**(2): 136-9.
47. O'Connell S, Lillis D, Cotter A, et al. Opt-out panel testing for HIV, hepatitis B and hepatitis C in an urban emergency department: a pilot study. *PloS one* 2016; **11**(3): e0150546.
48. Page K, Leeman L, Bishop S, Cano S, Bakhireva LN. Hepatitis C cascade of care among pregnant women on opioid agonist pharmacotherapy attending a comprehensive prenatal program. *Maternal and child health journal* 2017; **21**(9): 1778-83.
49. Ponziani FR, Santopaolo F, Siciliano M, et al. Missed linkage to care for patients who screened positive for Hepatitis C in a tertiary care centre: Results of the Telepass project. *Journal of Viral Hepatitis* 2021; **28**(4): 651-6.
50. Rizk C, Miceli J, Shiferaw B, et al. Implementing a comprehensive hepatitis C virus (HCV) clinic within a human immunodeficiency virus clinic: a model of care for HCV microelimination. *Open Forum Infectious Diseases*; 2019: Oxford University Press US; 2019. p. ofz361.
51. Rodriguez-Watson C, Rubenstein KB, Jonas MC, Sun Y, Horberg M, Loftus B. Hepatitis C care pathway associated with increased screening, confirmation, and diagnosis communication to patients. *Clinical Gastroenterology and Hepatology* 2021; **19**(3): 607-9. e2.
52. Rosecrans AM, Cheedalla A, Rives ST, et al. Public Health Clinic–Based Hepatitis C Treatment. *American journal of preventive medicine* 2020; **59**(3): 420-7.
53. Ryan P, Valencia J, Cuevas G, et al. HCV screening based on dried blood samples and linkage to care in people who use drugs: a prospective study. *International Journal of Drug Policy* 2021; **92**: 103134.

54. Saab S, Challita YP, Najarian LM, Guo R, Saggi SS, Choi G. Hepatitis C screening: barriers to linkage to care. *Journal of Clinical and Translational Hepatology* 2019; **7**(3): 226.
55. Schechter-Perkins EM, Miller NS, Hall J, et al. Implementation and preliminary results of an emergency department nontargeted, opt-out hepatitis C virus screening program. *Academic Emergency Medicine* 2018; **25**(11): 1216-26.
56. Scott J, Fagalde M, Baer A, et al. A population-based intervention to improve care cascades of patients with hepatitis C virus infection. *Hepatology Communications* 2021; **5**(3): 387-99.
57. Sherbuk JE, McManus KA, Kemp Knick T, Canan CE, Flickinger T, Dillingham R. Disparities in Hepatitis C Linkage to Care in the Direct Acting Antiviral Era: Findings From a Referral Clinic With an Embedded Nurse Navigator Model. *Frontiers in Public Health* 2019; **7**.
58. Simoncini GM, Oyola-Jimenez J, Singleton D, Volgraf J, Ramsey FV, Goldberg A. HIV and HCV screening among trauma patients. *International journal of STD & AIDS* 2019; **30**(7): 663-70.
59. Tapp H, Ludden T, Shade L, Thomas J, Mohanan S, Leonard M. Electronic medical record alert activation increase hepatitis C and HIV screening rates in primary care practices within a large healthcare system. *Preventive Medicine Reports* 2020; **17**: 101036.
60. Traeger MW, Pedrana AE, van Santen DK, et al. The impact of universal access to direct-acting antiviral therapy on the hepatitis C cascade of care among individuals attending primary and community health services. *Plos one* 2020; **15**(6): e0235445.
61. Turner BJ, Rochat A, Lill S, et al. Hepatitis C virus screening and care: complexity of implementation in primary care practices serving disadvantaged populations. *Annals of internal medicine* 2019; **171**(12): 865-74.
62. White DA, Anderson ES, Pfeil SK, Trivedi TK, Alter HJ. Results of a rapid hepatitis C virus screening and diagnostic testing program in an urban emergency department. *Annals of emergency medicine* 2016; **67**(1): 119-28.
63. Yang A, Zachary D, Giang J. Impact of a Nurse Care Coordinator Supporting a Clinical Pharmacist Practitioner in Further Managing HCV-Infected Patients. *Gastroenterology Nursing* 2021; **44**(1): E11-E7.
64. Younossi ZM, LaLuna LL, Santoro JJ, et al. Implementation of baby boomer hepatitis C screening and linking to care in gastroenterology practices: a multi-center pilot study. *BMC gastroenterology* 2016; **16**(1): 1-8.
65. Zuckerman A, Douglas A, Nwosu S, Choi L, Chastain C. Increasing success and evolving barriers in the hepatitis C cascade of care during the direct acting antiviral era. *PloS one* 2018; **13**(6): e0199174.
